# Supplementary material for: Conformational and electronic effects on the regioselectivity of the glycosylation of different anomers of N-dimethylmaleoyl-protected glucosamine acceptors
Source: Royal Society of Chemistry journal article supplement (doi:10.1039/b715847e), 2007-12-19
Supplement: b715847e.pdf [file b715847e.pdf]

# Conformational and electronic effects on the regioselectivity of the glycosylation of different anomers of *N*-dimethylmaleoyl-protected glucosamine acceptors

María L. Bohn,<sup>a</sup> María I. Colombo,<sup>a</sup> Edmundo A. Rúveda<sup>a</sup> and Carlos A. Stortz<sup>b\*</sup>

## Supplementary Information

**Supplementary Table 1.** Relative zero-point energies ( $\Delta E_{\text{ZPE}}$ ), vibrational enthalpies ( $\Delta H_{\text{vib}}$ )<sup>a</sup> and entropic terms<sup>b</sup> ( $-\text{T}\Delta\text{S}$ ) adding to the electronic energies to build the free energies of conformers **G1** and **T1** of DMM-protected glucosamine derivatives **7a**, **7b**, **8a** and **8b** and the three conformers of **12** calculated at the B3LYP/6-31+G\*\* level. All energies are indicated in  $\text{kJ}\cdot\text{mol}^{-1}$

| Compound           | $\Delta E$ | $\Delta E_{\text{ZPE}}$ | $\Delta H_{\text{vib}}$ | $-\text{T}\Delta\text{S}_{\text{vib}}$ | $-\text{T}\Delta\text{S}_{\text{rot}}$ | $\Delta G$ |
|--------------------|------------|-------------------------|-------------------------|----------------------------------------|----------------------------------------|------------|
| <b>7a G1-T1</b>    | -15.5      | +0.5                    | -0.6                    | +2.4                                   | -0.1                                   | -13.2      |
| <b>8a G1-T1</b>    | -21.6      | +1.3                    | -0.6                    | +1.8                                   | -0.1                                   | -19.2      |
| <b>7b G1-T1</b>    | +4.6       | -2.2                    | +0.9                    | -2.0                                   | -0.1                                   | +1.2       |
| <b>8b G1-T1</b>    | -3.3       | -1.2                    | +0.7                    | -1.7                                   | -0.1                                   | -5.7       |
| <b>12 G1- T1</b>   | +5.4       | -0.8                    | -0.2                    | +1.0                                   | -0.2                                   | +5.1       |
| <b>12 G1' – T1</b> | +8.7       | -2.7                    | +1.2                    | -3.7                                   | -0.2                                   | +3.3       |

<sup>a</sup> Relative change in vibrational enthalpies between 0 and 298.15 K (*i. e.*, excluding the zero-point energy). <sup>b</sup> At 298.15 K, splitted in rotational and vibrational terms.

**Supplementary Table 2.** Charge ( $q$ )<sup>a</sup> and Fukui functions ( $f$ ) on O3 and O4 calculated for the different conformers of DMM-protected glucosamine derivatives 7a, 7b, 8a and 8b at the B3LYP/6-31+G\*\* level

|                  | $q_{O3}$       |        |        |        | $q_{O4}$ |        |        |        | $f_{O3}$ |       |       |        | $f_{O4}$ |       |       |        |
|------------------|----------------|--------|--------|--------|----------|--------|--------|--------|----------|-------|-------|--------|----------|-------|-------|--------|
|                  | 1 <sup>a</sup> | 2      | 3      | 4      | 1        | 2      | 3      | 4      | 1        | 2     | 3     | 4      | 1        | 2     | 3     | 4      |
| <b><u>7a</u></b> |                |        |        |        |          |        |        |        |          |       |       |        |          |       |       |        |
| <b>G1</b>        | -0.562         | -0.691 | -0.654 | -0.721 | -0.492   | -0.671 | -0.613 | -0.671 | 0.055    | 0.011 | 0.000 | 0.007  | 0.040    | 0.027 | 0.024 | 0.029  |
| <b>G2</b>        | -0.560         | -0.681 | -0.693 | -0.719 | -0.492   | -0.642 | -0.630 | -0.660 | 0.034    | 0.071 | 0.059 | 0.067  | 0.037    | 0.055 | 0.039 | 0.029  |
| <b>G3</b>        | -0.556         | -0.700 | -0.718 | -0.709 | -0.501   | -0.684 | -0.754 | -0.688 | 0.050    | 0.067 | 0.060 | 0.070  | 0.035    | 0.044 | 0.031 | 0.045  |
| <b>T1</b>        | -0.500         | -0.711 | -0.667 | -0.754 | -0.482   | -0.706 | -0.754 | -0.724 | 0.045    | 0.089 | 0.071 | 0.088  | 0.113    | 0.176 | 0.171 | 0.176  |
| <b><u>8a</u></b> |                |        |        |        |          |        |        |        |          |       |       |        |          |       |       |        |
| <b>G1</b>        | -0.560         | -0.676 | -0.683 | -0.732 | -0.493   | -0.638 | -0.618 | -0.668 | 0.047    | 0.071 | 0.054 | 0.069  | 0.051    | 0.065 | 0.060 | 0.066  |
| <b>G3</b>        | -0.555         | -0.684 | -0.757 | -0.704 | -0.495   | -0.648 | -0.688 | 0.663  | 0.052    | 0.071 | 0.065 | 0.071  | 0.058    | 0.073 | 0.062 | 0.073  |
| <b>T1</b>        | -0.496         | -0.714 | -0.694 | -0.754 | -0.465   | -0.684 | -0.709 | -0.702 | 0.063    | 0.103 | 0.092 | 0.047  | 0.089    | 0.132 | 0.129 | 0.133  |
| <b><u>7b</u></b> |                |        |        |        |          |        |        |        |          |       |       |        |          |       |       |        |
| <b>T1</b>        | -0.539         | -0.660 | -0.675 | -0.719 | -0.525   | -0.690 | -0.728 | -0.702 | 0.059    | 0.075 | 0.066 | 0.077  | 0.052    | 0.101 | 0.084 | 0.099  |
| <b>G1</b>        | -0.527         | -0.678 | -0.663 | -0.681 | -0.503   | -0.635 | -0.692 | -0.650 | 0.053    | 0.054 | 0.039 | 0.053  | 0.035    | 0.050 | 0.048 | 0.050  |
| <b>G2</b>        | -0.525         | -0.660 | -0.669 | -0.679 | -0.504   | -0.641 | -0.669 | -0.654 | 0.041    | 0.054 | 0.042 | 0.052  | 0.021    | 0.038 | 0.024 | 0.033  |
| <b>G3</b>        | -0.522         | -0.667 | -0.657 | -0.673 | -0.511   | -0.647 | -0.713 | -0.671 | 0.045    | 0.048 | 0.035 | 0.043  | 0.035    | 0.045 | 0.034 | 0.042  |
| <b>G4</b>        | -0.527         | -0.659 | -0.671 | -0.710 | -0.541   | -0.654 | -0.652 | -0.663 | 0.036    | 0.050 | 0.044 | 0.054  | 0.023    | 0.053 | 0.037 | 0.051  |
| <b>G5</b>        | -0.526         | -0.647 | -0.700 | -0.717 | -0.541   | -0.659 | -0.689 | -0.673 | 0.051    | 0.063 | 0.059 | 0.068  | 0.038    | 0.070 | 0.050 | 0.067  |
| <b><u>8b</u></b> |                |        |        |        |          |        |        |        |          |       |       |        |          |       |       |        |
| <b>G1</b>        | -0.525         | -0.651 | -0.655 | -0.666 | -0.504   | -0.615 | -0.677 | -0.648 | 0.056    | 0.090 | 0.059 | 0.078  | 0.044    | 0.077 | 0.070 | 0.068  |
| <b>T1</b>        | -0.532         | -0.642 | -0.657 | -0.710 | -0.516   | -0.685 | -0.691 | -0.684 | 0.050    | 0.081 | 0.070 | 0.074  | 0.042    | 0.084 | 0.095 | 0.089  |
| <b>G3</b>        | -0.523         | -0.644 | -0.604 | -0.671 | -0.509   | -0.624 | -0.703 | -0.648 | 0.056    | 0.056 | 0.040 | -0.009 | 0.049    | 0.064 | 0.055 | -0.003 |
| <b>G4</b>        | -0.523         | -0.651 | -0.695 | -0.708 | -0.545   | -0.651 | -0.667 | -0.663 | 0.046    | 0.060 | 0.056 | 0.064  | 0.029    | 0.064 | 0.052 | 0.064  |

<sup>a</sup> According to: (1) Mulliken, (2) Merz.Singh-Kollmann, (3) CHelp scheme and (4) CHelpG scheme of fitting charges (see text)

**Supplementary Table 3.** Charges ( $q$ )<sup>a</sup> on O3 and O4 calculated for the different conformers of DMM-protected glucosamine derivatives **7a**, **7b**, **8a** and **8b** at the MP2/6-311++G\*\*//B3LYP/6-31+G\*\* level

|                  | $q_{O3}$<br>1 <sup>a</sup> | 2      | 3      | 4      | $q_{O4}$<br>1 | 2      | 3      | 4      |
|------------------|----------------------------|--------|--------|--------|---------------|--------|--------|--------|
| <b><u>7a</u></b> |                            |        |        |        |               |        |        |        |
| <b>G1</b>        | -0.266                     | -0.744 | -0.718 | -0.775 | -0.211        | -0.723 | -0.659 | -0.721 |
| <b>G2</b>        | -0.262                     | -0.735 | -0.756 | -0.772 | -0.199        | -0.690 | -0.670 | -0.706 |
| <b>G3</b>        | -0.260                     | -0.754 | -0.773 | -0.764 | -0.204        | -0.736 | -0.797 | -0.738 |
| <b>T1</b>        | -0.225                     | -0.762 | -0.721 | -0.802 | -0.176        | -0.739 | -0.781 | -0.754 |
| <b><u>8a</u></b> |                            |        |        |        |               |        |        |        |
| <b>G1</b>        | -0.264                     | -0.734 | -0.741 | -0.788 | -0.210        | -0.691 | -0.664 | -0.719 |
| <b>G3</b>        | -0.262                     | -0.740 | -0.810 | -0.759 | -0.190        | -0.696 | -0.727 | .0.712 |
| <b>T1</b>        | -0.231                     | -0.761 | -0.744 | -0.799 | -0.166        | -0.723 | -0.740 | -0.737 |
| <b><u>7b</u></b> |                            |        |        |        |               |        |        |        |
| <b>T1</b>        | -0.228                     | -0.705 | -0.713 | -0.765 | -0.231        | -0.726 | -0.754 | -0.738 |
| <b>G1</b>        | -0.255                     | -0.726 | -0.702 | -0.725 | -0.203        | -0.685 | -0.731 | -0.695 |
| <b>G2</b>        | -0.245                     | -0.704 | -0.712 | -0.721 | -0.198        | -0.686 | -0.712 | -0.697 |
| <b>G3</b>        | -0.243                     | -0.714 | -0.699 | -0.716 | -0.189        | -0.698 | -0.749 | -0.717 |
| <b>G4</b>        | -0.231                     | -0.706 | -0.726 | -0.759 | -0.248        | -0.695 | -0.696 | -0.703 |
| <b>G5</b>        | -0.228                     | -0.697 | -0.754 | -0.769 | -0.245        | -0.701 | -0.730 | -0.712 |
| <b><u>8b</u></b> |                            |        |        |        |               |        |        |        |
| <b>G1</b>        | -0.252                     | -0.700 | -0.699 | -0.712 | -0.202        | -0.664 | -0.726 | -0.687 |
| <b>T1</b>        | -0.227                     | -0.686 | -0.704 | -0.754 | -0.218        | -0.726 | -0.723 | -0.727 |
| <b>G3</b>        | -0.249                     | -0.691 | -0.649 | -0.714 | -0.178        | -0.673 | -0.738 | -0.693 |
| <b>G4</b>        | -0.232                     | -0.702 | -0.748 | -0.758 | -0.262        | -0.692 | -0.713 | -0.704 |

<sup>a</sup> According to: (1) Mulliken, (2) Merz.Singh-Kollmann, (3) CHelp scheme and (4) CHelpG scheme of fitting charges (see text)

**Supplementary Table 4.** Boltzmann-averaged charge (q) and Fukui functions on O3 and O4 calculated for DMM-protected glucosamine derivatives **7a**, **7b**, **8a** and **8b** at the B3LYP/6-31+G\*\* level. Charges were also recalculated at the MP2/6-311++G\*\* level.

|                                                  | <b>7a</b>     |        | <b>8a</b>     |        | <b>7b</b>     |        | <b>8b</b> |        |
|--------------------------------------------------|---------------|--------|---------------|--------|---------------|--------|-----------|--------|
|                                                  | O3            | O4     | O3            | O4     | O3            | O4     | O3        | O4     |
| <b>B3LYP/6-31+G**</b>                            |               |        |               |        |               |        |           |        |
| q Mulliken                                       | -0.562        | -0.492 | -0.559        | -0.493 | -0.537        | -0.521 | -0.526    | -0.509 |
| q MK                                             | -0.690        | -0.668 | -0.677        | -0.639 | -0.662        | -0.681 | -0.649    | -0.630 |
| q Chelp                                          | -0.664        | -0.625 | -0.691        | -0.625 | -0.673        | -0.721 | -0.652    | -0.682 |
| q CHelpG                                         | -0.720        | -0.671 | -0.729        | -0.667 | -0.712        | -0.693 | -0.677    | -0.655 |
| f Mulliken                                       | 0.0514        | 0.0398 | 0.0477        | 0.0517 | 0.0572        | 0.0490 | 0.0542    | 0.0430 |
| f MK                                             | 0.0232        | 0.0323 | 0.0712        | 0.0661 | 0.0714        | 0.0915 | 0.0828    | 0.0761 |
| f Chelp                                          | 0.0123        | 0.0270 | 0.0553        | 0.0602 | 0.0611        | 0.0767 | 0.0586    | 0.0714 |
| f CHelpG                                         | 0.0202        | 0.0301 | 0.0694        | 0.0668 | 0.0725        | 0.0902 | 0.0668    | 0.0636 |
| <b>MP2/6-311++G**</b>                            |               |        |               |        |               |        |           |        |
| q Mulliken                                       | -0.264        | -0.207 | -0.264        | -0.205 | -0.233        | -0.224 | -0.526    | -0.509 |
| q MK                                             | -0.743        | -0.716 | -0.735        | -0.692 | -0.709        | -0.717 | -0.649    | -0.630 |
| q Chelp                                          | -0.732        | -0.675 | -0.758        | -0.679 | -0.711        | -0.748 | -0.652    | -0.682 |
| q ChelpG                                         | -0.773        | -0.719 | -0.781        | -0.717 | -0.756        | -0.729 | -0.677    | -0.655 |
| <b>q<sub>O4</sub>/q<sub>O3</sub><sup>a</sup></b> |               |        |               |        |               |        |           |        |
| Mulliken                                         | 0.877 (0.784) |        | 0.882 (0.777) |        | 0.972 (0.961) |        | 0.968     |        |
| MK                                               | 0.968 (0.964) |        | 0.944 (0.941) |        | 1.029 (1.011) |        | 0.971     |        |
| Chelp                                            | 0.942 (0.922) |        | 0.904 (0.896) |        | 1.071 (1.052) |        | 1.046     |        |
| ChelpG                                           | 0.932 (0.930) |        | 0.915 (0.918) |        | 0.973 (0.964) |        | 0.968     |        |
| <b>f<sub>O4</sub>/f<sub>O3</sub></b>             |               |        |               |        |               |        |           |        |
| Mulliken                                         | 0.77          |        | 1.08          |        | 0.86          |        | 0.79      |        |
| MK                                               | 1.39          |        | 0.93          |        | 1.28          |        | 0.92      |        |
| Chelp                                            | 2.20          |        | 1.09          |        | 1.26          |        | 1.22      |        |
| ChelpG                                           | 1.49          |        | 0.96          |        | 1.24          |        | 0.95      |        |
| <b>Rate<sub>O4/O3</sub><sup>b</sup></b>          |               |        |               |        |               |        |           |        |
|                                                  | 0.31          |        | 0.00          |        | 2.90          |        | 1.00      |        |

<sup>a</sup> In parentheses, value determined by the MP2/6-311++G\*\* calculation. <sup>b</sup> Experimental rate for the analogs **2a**, **2b**, **3a** and **3b** (ref. 6).

**Supplementary Table 5.** Charge determined by Mulliken analysis on selected atoms of several conformers of different compounds at the B3LYP/6-31+G\*\* level

|            | Conf       | Char <sup>a</sup> | C1    | C2    | C3    | C4    | C5    | O5    | O1    | O3    | O4    |
|------------|------------|-------------------|-------|-------|-------|-------|-------|-------|-------|-------|-------|
| <b>7a</b>  | Avg        | $\alpha$ /132     | 0.01  | -0.30 | -0.46 | 0.49  | 0.06  | -0.27 | -0.23 | -0.56 | -0.49 |
| <b>8a</b>  | Avg        | $\beta$ /131      | 0.01  | -0.29 | -0.46 | 0.49  | 0.01  | -0.26 | -0.23 | -0.56 | -0.49 |
| <b>7b</b>  | Avg        | $\beta$ /182      | 0.36  | -1.36 | 0.51  | 0.02  | -0.11 | -0.35 | -0.25 | -0.54 | -0.52 |
| <b>8b</b>  | Avg        | $\beta$ /186      | 0.41  | -1.15 | 0.33  | -0.03 | 0.06  | -0.35 | -0.25 | -0.53 | -0.51 |
| <b>10a</b> | -          | $\alpha$ /158     | 0.00  | -0.40 | -0.04 | -0.37 | -0.01 | -0.29 | -0.27 | -     | -     |
| <b>10b</b> | -          | $\beta$ /189      | 0.24  | -0.90 | 0.09  | -0.31 | -0.09 | -0.36 | -0.28 | -     | -     |
| <b>11a</b> | Avg        | $\alpha$ /158     | 0.15  | -0.38 | -0.49 | 0.23  | -0.29 | -0.27 | -0.25 | -     | -0.49 |
| <b>11b</b> | Avg        | $\beta$ /189      | 0.35  | -1.15 | -0.10 | 0.13  | -0.17 | -0.35 | -0.25 | -     | -0.49 |
| <b>12</b>  | <b>G1</b>  | -/128             | 0.02  | -0.29 | -0.35 | 0.34  | 0.04  | -0.31 | -     | -0.58 | -0.50 |
| <b>12</b>  | <b>G1'</b> | -/176             | 0.07  | -0.56 | 0.15  | -0.09 | 0.01  | -0.30 | -     | -0.53 | -0.51 |
| <b>12</b>  | <b>T</b>   | -/172             | 0.10  | -0.88 | 0.49  | 0.05  | -0.15 | -0.31 | -     | -0.55 | -0.54 |
| <b>13a</b> | <b>G1</b>  | $\alpha$ /-       | -0.01 | -0.09 | 0.02  | 0.02  | 0.00  | -0.30 | -0.33 | -0.55 | -0.54 |
| <b>13b</b> | <b>G1</b>  | $\beta$ /-        | 0.36  | -0.40 | 0.14  | -0.16 | 0.05  | -0.35 | -0.28 | -0.55 | -0.53 |

<sup>a</sup>Characteristics:  $\alpha$  or  $\beta$  refer to the anomeric configuration, and the number after refers to the  $\chi_2$  angle (in °) of the DMM group

**Supplementary Table 6.** Charge determined by Mulliken analysis on selected atoms of several conformers of different compounds at the MP2/6-311++G\*\*//B3LYP/6-31+G\*\* level

|            | Conf       | Char <sup>a</sup> | C1    | C2    | C3    | C4                 | C5    | O5    | O1    | O3    | O4    |
|------------|------------|-------------------|-------|-------|-------|--------------------|-------|-------|-------|-------|-------|
| <b>7a</b>  | Avg        | $\alpha$ /132     | -0.54 | -0.30 | -0.40 | -0.59 <sup>b</sup> | 0.01  | 0.01  | 0.01  | -0.26 | -0.21 |
| <b>8a</b>  | Avg        | $\beta$ /131      | -0.54 | -0.28 | -0.39 | -0.60 <sup>b</sup> | -0.10 | 0.01  | 0.01  | -0.26 | -0.21 |
| <b>7b</b>  | Avg        | $\beta$ /182      | -0.43 | -0.71 | -0.06 | -0.60 <sup>b</sup> | -0.30 | -0.12 | -0.10 | -0.23 | -0.22 |
| <b>8b</b>  | Avg        | $\beta$ /186      | -0.20 | -0.96 | -0.18 | -0.59 <sup>b</sup> | -0.12 | -0.11 | -0.10 | -0.25 | -0.20 |
| <b>10a</b> | -          | $\alpha$ /158     | -0.88 | -0.12 | 0.02  | -0.61              | -0.14 | -0.10 | -0.07 | -     | -     |
| <b>10b</b> | -          | $\beta$ /189      | -0.39 | -1.02 | 0.21  | -0.58              | -0.20 | -0.19 | -0.12 | -     | -     |
| <b>11a</b> | Avg        | $\alpha$ /158     | -0.60 | -0.38 | -0.14 | -0.57              | -0.33 | -0.02 | -0.02 | -     | -0.18 |
| <b>11b</b> | Avg        | $\beta$ /189      | -0.31 | -1.30 | 0.23  | -0.58              | -0.35 | -0.12 | -0.10 | -     | -0.19 |
| <b>12</b>  | <b>G1</b>  | -/128             | -0.17 | -0.28 | -0.27 | -0.44              | -0.23 | -0.08 | -     | -0.28 | -0.23 |
| <b>12</b>  | <b>G1'</b> | -/176             | -0.04 | -0.86 | -0.26 | -0.33              | -0.21 | -0.08 | -     | -0.25 | -0.22 |
| <b>12</b>  | <b>T</b>   | -/172             | -0.08 | -1.08 | 0.16  | -0.57              | -0.37 | -0.11 | -     | -0.23 | -0.24 |
| <b>13a</b> | <b>G1</b>  | $\alpha$ /-       | -0.33 | -0.57 | -0.40 | -0.13              | -0.30 | -0.03 | -0.11 | -0.29 | -0.23 |
| <b>13b</b> | <b>G1</b>  | $\beta$ /-        | -0.10 | -0.47 | -0.48 | -0.26              | -0.30 | -0.08 | -0.16 | -0.26 | -0.23 |

<sup>a</sup>Characteristics:  $\alpha$  or  $\beta$  refer to the anomeric configuration, and the number after refers to the  $\chi_2$  angle of the DMM group. <sup>b</sup>although the average is similar for  $\alpha$ - and  $\beta$ -anomers, the range is different: -0.67 to -0.32 for **7a/8a** and -1.06 to -0.49 for **7b/8b**.

Cartesian coordinates for the different conformers, as minimized at B3LYP/6-31+G\*\*  
level

Compound **7a** - Conformer **G1**

|     |           |           |           |
|-----|-----------|-----------|-----------|
| C 0 | -0.555644 | -1.042418 | -0.130910 |
| C 0 | 0.212656  | 0.189286  | -0.673312 |
| C 0 | -0.456137 | 1.473757  | -0.157380 |
| C 0 | -1.936535 | 1.460691  | -0.552741 |
| C 0 | -2.612678 | 0.206852  | 0.012435  |
| C 0 | -4.066807 | 0.083216  | -0.402088 |
| O 0 | -1.921299 | -0.954616 | -0.480325 |
| O 0 | -0.338137 | -1.106135 | 1.256516  |
| N 0 | 1.649591  | 0.095989  | -0.374334 |
| O 0 | 0.108932  | 2.656850  | -0.714841 |
| O 0 | -2.592158 | 2.609374  | -0.034633 |
| O 0 | -4.687164 | -0.913786 | 0.394428  |
| C 0 | 2.443600  | 0.864453  | 0.475662  |
| C 0 | 3.825924  | 0.266901  | 0.471937  |
| C 0 | 3.832927  | -0.773565 | -0.382107 |
| C 0 | 2.448398  | -0.908338 | -0.947938 |
| O 0 | 2.110730  | 1.872749  | 1.083293  |
| O 0 | 2.059713  | -1.728170 | -1.759277 |
| C 0 | -0.847313 | -2.294454 | 1.866682  |
| C 0 | 4.906968  | 0.864221  | 1.308137  |
| C 0 | 4.921051  | -1.704494 | -0.799034 |
| C 0 | -6.046812 | -1.115736 | 0.058167  |
| H 0 | -0.209106 | -1.959587 | -0.619833 |
| H 0 | 0.119636  | 0.161523  | -1.764206 |
| H 0 | -0.395421 | 1.511403  | 0.934474  |
| H 0 | -2.008604 | 1.446001  | -1.652712 |
| H 0 | -2.562307 | 0.236486  | 1.108153  |
| H 0 | -4.121800 | -0.186243 | -1.469404 |
| H 0 | -4.561013 | 1.054730  | -0.257708 |
| H 0 | 0.869107  | 2.883517  | -0.154374 |
| H 0 | -2.022150 | 3.366732  | -0.237951 |
| H 0 | -0.578530 | -2.238367 | 2.922954  |
| H 0 | -0.387381 | -3.186504 | 1.418912  |
| H 0 | -1.935376 | -2.358840 | 1.762866  |
| H 0 | 5.855828  | 0.341586  | 1.170662  |
| H 0 | 4.637574  | 0.829053  | 2.369758  |
| H 0 | 5.047654  | 1.921545  | 1.058184  |
| H 0 | 5.864800  | -1.469000 | -0.302767 |
| H 0 | 5.072577  | -1.658085 | -1.883231 |
| H 0 | 4.651472  | -2.741001 | -0.567235 |
| H 0 | -6.432349 | -1.888123 | 0.727473  |
| H 0 | -6.157338 | -1.455309 | -0.983306 |
| H 0 | -6.636928 | -0.195799 | 0.193286  |

Compound **7a** - Conformer **G2**

|     |           |           |           |
|-----|-----------|-----------|-----------|
| C 0 | -0.657778 | -0.959722 | -0.027670 |
| C 0 | 0.138773  | 0.218864  | -0.639781 |
| C 0 | -0.472506 | 1.545739  | -0.161536 |
| C 0 | -1.959120 | 1.569961  | -0.531158 |
| C 0 | -2.679293 | 0.363256  | 0.082132  |
| C 0 | -4.145152 | 0.290815  | -0.333154 |
| O 0 | -2.028084 | -0.844781 | -0.360189 |
| O 0 | -0.417153 | -0.963050 | 1.356959  |
| N 0 | 1.578004  | 0.083993  | -0.371137 |
| O 0 | 0.122176  | 2.684442  | -0.777129 |
| O 0 | -2.566416 | 2.757390  | -0.043234 |
| O 0 | -4.886012 | -0.681696 | 0.389717  |
| C 0 | 2.421810  | 0.858221  | 0.424552  |
| C 0 | 3.783252  | 0.214776  | 0.404625  |
| C 0 | 3.730639  | -0.858246 | -0.406555 |
| C 0 | 2.326014  | -0.968958 | -0.925669 |
| O 0 | 2.139575  | 1.898941  | 1.001812  |
| O 0 | 1.885860  | -1.807514 | -1.690461 |
| C 0 | -0.927662 | -2.110795 | 2.035808  |
| C 0 | 4.907884  | 0.807612  | 1.184581  |
| C 0 | 4.774846  | -1.841213 | -0.816422 |
| C 0 | -4.960325 | -1.964763 | -0.219578 |
| H 0 | -0.349067 | -1.910119 | -0.476864 |
| H 0 | 0.017213  | 0.150120  | -1.726042 |
| H 0 | -0.388877 | 1.623872  | 0.926560  |
| H 0 | -2.047942 | 1.521721  | -1.629260 |
| H 0 | -2.627643 | 0.431399  | 1.176048  |
| H 0 | -4.214042 | 0.107989  | -1.416372 |
| H 0 | -4.600002 | 1.260984  | -0.114642 |
| H 0 | 0.901069  | 2.907022  | -0.241354 |
| H 0 | -1.979430 | 3.488711  | -0.288795 |
| H 0 | -0.614702 | -2.019100 | 3.077265  |
| H 0 | -0.509653 | -3.032839 | 1.608134  |
| H 0 | -2.020915 | -2.151483 | 1.983154  |
| H 0 | 5.836064  | 0.251997  | 1.035929  |
| H 0 | 4.672446  | 0.817051  | 2.254814  |
| H 0 | 5.070843  | 1.850985  | 0.893177  |
| H 0 | 5.744579  | -1.607530 | -0.372131 |
| H 0 | 4.881511  | -1.856638 | -1.906715 |
| H 0 | 4.487954  | -2.855916 | -0.518012 |
| H 0 | -5.611792 | -2.571170 | 0.414597  |
| H 0 | -3.975825 | -2.439603 | -0.298543 |
| H 0 | -5.405677 | -1.898531 | -1.223835 |

Compound **7a** - Conformer **G3**

|     |           |           |           |
|-----|-----------|-----------|-----------|
| C 0 | -0.538436 | -1.095011 | -0.274817 |
| C 0 | 0.207528  | 0.183264  | -0.733603 |
| C 0 | -0.534288 | 1.422037  | -0.206644 |
| C 0 | -1.990152 | 1.371152  | -0.679964 |
| C 0 | -2.650675 | 0.071991  | -0.206738 |
| C 0 | -4.073351 | -0.093613 | -0.735723 |
| O 0 | -1.887282 | -1.047244 | -0.690479 |
| O 0 | -0.389666 | -1.202774 | 1.119986  |
| N 0 | 1.630427  | 0.130544  | -0.365386 |
| O 0 | 0.013543  | 2.645989  | -0.687510 |
| O 0 | -2.717419 | 2.468523  | -0.144562 |
| O 0 | -4.802211 | -1.114493 | -0.067220 |
| C 0 | 2.351389  | 0.893520  | 0.551891  |
| C 0 | 3.753854  | 0.346899  | 0.597009  |
| C 0 | 3.842697  | -0.659759 | -0.292366 |
| C 0 | 2.494281  | -0.822228 | -0.933239 |
| O 0 | 1.950149  | 1.864267  | 1.179180  |
| O 0 | 2.177627  | -1.623881 | -1.792448 |
| C 0 | -0.848435 | -2.446579 | 1.653323  |
| C 0 | 4.768476  | 0.951060  | 1.508148  |
| C 0 | 4.984424  | -1.534942 | -0.685892 |
| C 0 | -5.449135 | -0.682039 | 1.118511  |
| H 0 | -0.130549 | -1.979414 | -0.776313 |
| H 0 | 0.169728  | 0.192753  | -1.828142 |
| H 0 | -0.531464 | 1.417858  | 0.887640  |
| H 0 | -2.005761 | 1.405924  | -1.781812 |
| H 0 | -2.658894 | 0.069094  | 0.891012  |
| H 0 | -4.021898 | -0.388725 | -1.788897 |
| H 0 | -4.596123 | 0.869199  | -0.660679 |
| H 0 | 0.736579  | 2.875757  | -0.081003 |
| H 0 | -2.173085 | 3.257270  | -0.290379 |
| H 0 | -0.655458 | -2.413089 | 2.727043  |
| H 0 | -0.296069 | -3.286067 | 1.208750  |
| H 0 | -1.919414 | -2.586104 | 1.471845  |
| H 0 | 5.741062  | 0.465689  | 1.404072  |
| H 0 | 4.445780  | 0.870773  | 2.552268  |
| H 0 | 4.884547  | 2.020425  | 1.300210  |
| H 0 | 5.891433  | -1.287866 | -0.130322 |
| H 0 | 5.191214  | -1.438920 | -1.757632 |
| H 0 | 4.740634  | -2.588643 | -0.509911 |
| H 0 | -5.984503 | -1.546101 | 1.518768  |
| H 0 | -6.169790 | 0.122735  | 0.909020  |
| H 0 | -4.737937 | -0.323960 | 1.877207  |

Compound **7a** - Conformer **T1**

|     |           |           |           |
|-----|-----------|-----------|-----------|
| C 0 | -0.399064 | -1.318164 | -0.070834 |
| C 0 | 0.202636  | -0.027066 | -0.661660 |
| C 0 | -0.628825 | 1.211706  | -0.272824 |
| C 0 | -2.088667 | 0.980940  | -0.672047 |
| C 0 | -2.603852 | -0.361471 | -0.115910 |
| C 0 | -3.978271 | -0.748613 | -0.679924 |
| O 0 | -1.747566 | -1.452619 | -0.485919 |
| O 0 | -0.255657 | -1.272549 | 1.326127  |
| N 0 | 1.626550  | 0.091571  | -0.327925 |
| O 0 | -0.138485 | 2.358970  | -0.950685 |
| O 0 | -2.852722 | 2.056231  | -0.145224 |
| O 0 | -4.993063 | 0.210265  | -0.381257 |
| C 0 | 2.276931  | 0.969818  | 0.542439  |
| C 0 | 3.743559  | 0.621295  | 0.518882  |
| C 0 | 3.924805  | -0.388822 | -0.352149 |
| C 0 | 2.580916  | -0.751733 | -0.915581 |
| O 0 | 1.774848  | 1.879036  | 1.183324  |
| O 0 | 2.333679  | -1.620509 | -1.733199 |
| C 0 | -0.546917 | -2.504558 | 1.983078  |
| C 0 | 4.710254  | 1.380255  | 1.363954  |
| C 0 | 5.154718  | -1.113453 | -0.785039 |
| C 0 | -5.626882 | 0.027495  | 0.881739  |
| H 0 | 0.100761  | -2.202608 | -0.482330 |
| H 0 | 0.154111  | -0.135593 | -1.750496 |
| H 0 | -0.596464 | 1.363575  | 0.808744  |
| H 0 | -2.148379 | 0.964729  | -1.773024 |
| H 0 | -2.648040 | -0.279618 | 0.978669  |
| H 0 | -4.260923 | -1.741568 | -0.304553 |
| H 0 | -3.915611 | -0.802131 | -1.771604 |
| H 0 | 0.419790  | 2.842511  | -0.326210 |
| H 0 | -3.785558 | 1.861713  | -0.332703 |
| H 0 | -0.341052 | -2.348073 | 3.043401  |
| H 0 | 0.094214  | -3.311539 | 1.601734  |
| H 0 | -1.596667 | -2.790620 | 1.850851  |
| H 0 | 5.732356  | 1.020705  | 1.227582  |
| H 0 | 4.445512  | 1.294781  | 2.423821  |
| H 0 | 4.677823  | 2.448250  | 1.121542  |
| H 0 | 6.045125  | -0.732346 | -0.280556 |
| H 0 | 5.296581  | -1.018425 | -1.867410 |
| H 0 | 5.064746  | -2.185478 | -0.576574 |
| H 0 | -4.926663 | 0.157727  | 1.717163  |
| H 0 | -6.084728 | -0.969325 | 0.944534  |
| H 0 | -6.409114 | 0.785980  | 0.952823  |

Compound **7b** - Conformer **G1**

|     |           |           |           |
|-----|-----------|-----------|-----------|
| C 0 | 0.582630  | 0.928355  | -0.003738 |
| C 0 | -0.194594 | -0.314858 | -0.480786 |
| C 0 | 0.475846  | -1.577991 | 0.089246  |
| C 0 | 1.967858  | -1.597509 | -0.252896 |
| C 0 | 2.627967  | -0.283784 | 0.192897  |
| C 0 | 4.089762  | -0.203003 | -0.207840 |
| O 0 | 1.934395  | 0.802387  | -0.428410 |
| O 0 | 0.019846  | 2.050193  | -0.594267 |
| N 0 | -1.618825 | -0.252909 | -0.161131 |
| O 0 | -0.068951 | -2.780639 | -0.459261 |
| O 0 | 2.616254  | -2.682729 | 0.398139  |
| O 0 | 4.695513  | 0.877929  | 0.481050  |
| C 0 | -2.182044 | -0.075349 | 1.105777  |
| C 0 | -3.659027 | 0.140275  | 0.915202  |
| C 0 | -3.918608 | 0.126320  | -0.407188 |
| C 0 | -2.622611 | -0.103119 | -1.136312 |
| O 0 | -1.575129 | -0.101905 | 2.163837  |
| O 0 | -2.453948 | -0.165671 | -2.337231 |
| C 0 | 0.561791  | 3.289895  | -0.130640 |
| C 0 | -4.555472 | 0.326524  | 2.093174  |
| C 0 | -5.193759 | 0.291275  | -1.163167 |
| C 0 | 6.061935  | 1.040905  | 0.150231  |
| H 0 | 0.560994  | 1.013468  | 1.096623  |
| H 0 | -0.143209 | -0.336637 | -1.573379 |
| H 0 | 0.373055  | -1.587027 | 1.182254  |
| H 0 | 2.068805  | -1.691544 | -1.345728 |
| H 0 | 2.562260  | -0.197722 | 1.288737  |
| H 0 | 4.159020  | -0.055074 | -1.297856 |
| H 0 | 4.582216  | -1.151403 | 0.050858  |
| H 0 | -0.963077 | -2.911826 | -0.118504 |
| H 0 | 2.100585  | -3.479692 | 0.206604  |
| H 0 | -0.004093 | 4.076638  | -0.632080 |
| H 0 | 1.622501  | 3.373663  | -0.384811 |
| H 0 | 0.436809  | 3.384986  | 0.957066  |
| H 0 | -5.594443 | 0.471218  | 1.789825  |
| H 0 | -4.238352 | 1.192515  | 2.684950  |
| H 0 | -4.502457 | -0.540870 | 2.760753  |
| H 0 | -6.040808 | 0.460098  | -0.494957 |
| H 0 | -5.397987 | -0.596093 | -1.772893 |
| H 0 | -5.120097 | 1.134567  | -1.858801 |
| H 0 | 6.193234  | 1.258782  | -0.920976 |
| H 0 | 6.647864  | 0.142974  | 0.401478  |
| H 0 | 6.435081  | 1.885202  | 0.734125  |

Compound **7b** - Conformer **G2**

|     |           |           |           |
|-----|-----------|-----------|-----------|
| C 0 | -0.676180 | -0.850820 | 0.086308  |
| C 0 | 0.125052  | 0.348301  | -0.457544 |
| C 0 | -0.489537 | 1.650605  | 0.084446  |
| C 0 | -1.986140 | 1.706344  | -0.228876 |
| C 0 | -2.687521 | 0.432406  | 0.268879  |
| C 0 | -4.164280 | 0.407757  | -0.116499 |
| O 0 | -2.036411 | -0.705143 | -0.315392 |
| O 0 | -0.153926 | -2.010619 | -0.467143 |
| N 0 | 1.554327  | 0.251207  | -0.173093 |
| O 0 | 0.082103  | 2.815155  | -0.515710 |
| O 0 | -2.586952 | 2.831499  | 0.399091  |
| O 0 | -4.899025 | -0.618379 | 0.531969  |
| C 0 | 2.145957  | 0.097817  | 1.083766  |
| C 0 | 3.611617  | -0.161121 | 0.862235  |
| C 0 | 3.836181  | -0.195767 | -0.466262 |
| C 0 | 2.527238  | 0.043281  | -1.168754 |
| O 0 | 1.566949  | 0.170353  | 2.155329  |
| O 0 | 2.327077  | 0.069784  | -2.366098 |
| C 0 | -0.666958 | -3.219926 | 0.093006  |
| C 0 | 4.534075  | -0.332829 | 2.022193  |
| C 0 | 5.086264  | -0.417177 | -1.249185 |
| C 0 | -4.987324 | -1.845328 | -0.180965 |
| H 0 | -0.633595 | -0.890362 | 1.188215  |
| H 0 | 0.044548  | 0.333141  | -1.548550 |
| H 0 | -0.362742 | 1.691564  | 1.174160  |
| H 0 | -2.104538 | 1.770202  | -1.322410 |
| H 0 | -2.614242 | 0.381789  | 1.366400  |
| H 0 | -4.255268 | 0.324055  | -1.210175 |
| H 0 | -4.604577 | 1.357796  | 0.198180  |
| H 0 | 0.983152  | 2.935219  | -0.189441 |
| H 0 | -2.055214 | 3.606684  | 0.166768  |
| H 0 | -0.100518 | -4.033595 | -0.362848 |
| H 0 | -1.730801 | -3.340800 | -0.134645 |
| H 0 | -0.521704 | -3.237439 | 1.182008  |
| H 0 | 5.560078  | -0.517236 | 1.697136  |
| H 0 | 4.209283  | -1.168788 | 2.651744  |
| H 0 | 4.523096  | 0.557903  | 2.660433  |
| H 0 | 5.946411  | -0.586241 | -0.598015 |
| H 0 | 5.296053  | 0.444975  | -1.892281 |
| H 0 | 4.973312  | -1.279860 | -1.915124 |
| H 0 | -4.005169 | -2.311477 | -0.317974 |
| H 0 | -5.450657 | -1.695298 | -1.167830 |
| H 0 | -5.626391 | -2.503136 | 0.413048  |

Compound **7b** - Conformer **G3**

|     |           |           |           |
|-----|-----------|-----------|-----------|
| C 0 | 0.583830  | 0.956438  | -0.180941 |
| C 0 | -0.178554 | -0.338325 | -0.526183 |
| C 0 | 0.559580  | -1.537992 | 0.094759  |
| C 0 | 2.030275  | -1.543628 | -0.328347 |
| C 0 | 2.677049  | -0.183141 | -0.027355 |
| C 0 | 4.108739  | -0.092403 | -0.552752 |
| O 0 | 1.913450  | 0.839285  | -0.672634 |
| O 0 | -0.046528 | 2.017801  | -0.813010 |
| N 0 | -1.585241 | -0.291604 | -0.133273 |
| O 0 | 0.022170  | -2.791965 | -0.331706 |
| O 0 | 2.749224  | -2.551426 | 0.372755  |
| O 0 | 4.817348  | 1.034820  | -0.059919 |
| C 0 | -2.083727 | -0.021257 | 1.144470  |
| C 0 | -3.572924 | 0.152931  | 1.018861  |
| C 0 | -3.902569 | 0.028359  | -0.282008 |
| C 0 | -2.642906 | -0.235513 | -1.060934 |
| O 0 | -1.420405 | 0.049026  | 2.166158  |
| O 0 | -2.536586 | -0.388366 | -2.260753 |
| C 0 | 0.485310  | 3.301686  | -0.474545 |
| C 0 | -4.409060 | 0.418827  | 2.225669  |
| C 0 | -5.219962 | 0.109921  | -0.976560 |
| C 0 | 5.430659  | 0.830067  | 1.202447  |
| H 0 | 0.620124  | 1.117507  | 0.910743  |
| H 0 | -0.184187 | -0.437469 | -1.615732 |
| H 0 | 0.516534  | -1.467453 | 1.189788  |
| H 0 | 2.075632  | -1.725600 | -1.413822 |
| H 0 | 2.669839  | -0.025205 | 1.062944  |
| H 0 | 4.068940  | 0.018916  | -1.641299 |
| H 0 | 4.638375  | -1.023226 | -0.309217 |
| H 0 | -0.854902 | -2.912588 | 0.054547  |
| H 0 | 2.257227  | -3.378939 | 0.269129  |
| H 0 | -0.136621 | 4.034991  | -0.990282 |
| H 0 | 1.523851  | 3.395653  | -0.805085 |
| H 0 | 0.427968  | 3.471074  | 0.609915  |
| H 0 | -5.462283 | 0.544515  | 1.966182  |
| H 0 | -4.063476 | 1.321895  | 2.740837  |
| H 0 | -4.321384 | -0.402044 | 2.946487  |
| H 0 | -6.033165 | 0.314570  | -0.277041 |
| H 0 | -5.436518 | -0.826190 | -1.503490 |
| H 0 | -5.203238 | 0.897329  | -1.738238 |
| H 0 | 6.150693  | -0.001319 | 1.165752  |
| H 0 | 4.698127  | 0.622888  | 1.996141  |
| H 0 | 5.961309  | 1.752687  | 1.448041  |

Compound **7b** - Conformer **G4**

|     |           |           |           |
|-----|-----------|-----------|-----------|
| C 0 | 0.635923  | 0.991657  | -0.004697 |
| C 0 | -0.203791 | -0.202260 | -0.496893 |
| C 0 | 0.393119  | -1.507281 | 0.050103  |
| C 0 | 1.885143  | -1.602027 | -0.284464 |
| C 0 | 2.617019  | -0.331745 | 0.192116  |
| C 0 | 4.084494  | -0.305389 | -0.199105 |
| O 0 | 1.989858  | 0.798322  | -0.414940 |
| O 0 | 0.148989  | 2.145480  | -0.596601 |
| N 0 | -1.615080 | -0.068519 | -0.170648 |
| O 0 | -0.328395 | -2.595272 | -0.509942 |
| O 0 | 2.351032  | -2.788400 | 0.374078  |
| O 0 | 4.742939  | 0.710000  | 0.532471  |
| C 0 | -2.177329 | -0.004250 | 1.102085  |
| C 0 | -3.669125 | 0.096519  | 0.926942  |
| C 0 | -3.937521 | 0.091837  | -0.393093 |
| C 0 | -2.632236 | -0.015515 | -1.135189 |
| O 0 | -1.561347 | -0.020457 | 2.156169  |
| O 0 | -2.469418 | -0.050016 | -2.338794 |
| C 0 | 0.726565  | 3.352189  | -0.093788 |
| C 0 | -4.567409 | 0.179714  | 2.115266  |
| C 0 | -5.227709 | 0.169377  | -1.137483 |
| C 0 | 6.106000  | 0.853127  | 0.176235  |
| H 0 | 0.606973  | 1.070932  | 1.095515  |
| H 0 | -0.157344 | -0.209389 | -1.590379 |
| H 0 | 0.296228  | -1.517210 | 1.145246  |
| H 0 | 1.994626  | -1.700904 | -1.373728 |
| H 0 | 2.547354  | -0.267631 | 1.289391  |
| H 0 | 4.166045  | -0.120611 | -1.282792 |
| H 0 | 4.542597  | -1.283847 | 0.023719  |
| H 0 | 0.073709  | -3.405818 | -0.166137 |
| H 0 | 3.108618  | -3.151484 | -0.099746 |
| H 0 | 0.210589  | 4.170728  | -0.598204 |
| H 0 | 1.797811  | 3.396854  | -0.312806 |
| H 0 | 0.570173  | 3.434478  | 0.990867  |
| H 0 | -5.616844 | 0.256063  | 1.822633  |
| H 0 | -4.310592 | 1.047318  | 2.733373  |
| H 0 | -4.444698 | -0.703012 | 2.752935  |
| H 0 | -6.079829 | 0.261643  | -0.460607 |
| H 0 | -5.366996 | -0.722912 | -1.758266 |
| H 0 | -5.226067 | 1.025756  | -1.820980 |
| H 0 | 6.217200  | 1.126598  | -0.884049 |
| H 0 | 6.671402  | -0.073256 | 0.364091  |
| H 0 | 6.516484  | 1.652364  | 0.796727  |

Compound **7b** - Conformer **G5**

|     |           |           |           |
|-----|-----------|-----------|-----------|
| C 0 | -0.731896 | -0.908869 | 0.069876  |
| C 0 | 0.135848  | 0.241910  | -0.472429 |
| C 0 | -0.399628 | 1.578366  | 0.059723  |
| C 0 | -1.891944 | 1.721250  | -0.250636 |
| C 0 | -2.669174 | 0.491474  | 0.261424  |
| C 0 | -4.146805 | 0.534885  | -0.120655 |
| O 0 | -2.090516 | -0.683215 | -0.318637 |
| O 0 | -0.291883 | -2.093722 | -0.497021 |
| N 0 | 1.548750  | 0.063605  | -0.176616 |
| O 0 | 0.351552  | 2.626775  | -0.535405 |
| O 0 | -2.303669 | 2.935942  | 0.391800  |
| O 0 | -4.942798 | -0.424946 | 0.550939  |
| C 0 | 2.138276  | 0.007067  | 1.084042  |
| C 0 | 3.621950  | -0.140863 | 0.877174  |
| C 0 | 3.859558  | -0.170223 | -0.448554 |
| C 0 | 2.541059  | -0.038779 | -1.162957 |
| O 0 | 1.546714  | 0.059879  | 2.150918  |
| O 0 | 2.350449  | -0.024390 | -2.362827 |
| C 0 | -0.843602 | -3.274328 | 0.084633  |
| C 0 | 4.544906  | -0.227619 | 2.046136  |
| C 0 | 5.129232  | -0.301406 | -1.220182 |
| C 0 | -5.085930 | -1.673415 | -0.117669 |
| H 0 | -0.682563 | -0.956825 | 1.170784  |
| H 0 | 0.062553  | 0.226246  | -1.564401 |
| H 0 | -0.281318 | 1.605534  | 1.152435  |
| H 0 | -2.015472 | 1.803962  | -1.339955 |
| H 0 | -2.594135 | 0.449521  | 1.359372  |
| H 0 | -4.243466 | 0.430511  | -1.212756 |
| H 0 | -4.546775 | 1.511554  | 0.173855  |
| H 0 | -0.013537 | 3.458870  | -0.201814 |
| H 0 | -3.044759 | 3.327148  | -0.085855 |
| H 0 | -0.331955 | -4.115810 | -0.385303 |
| H 0 | -1.919187 | -3.346395 | -0.107977 |
| H 0 | -0.663671 | -3.296022 | 1.168347  |
| H 0 | 5.584994  | -0.335672 | 1.731121  |
| H 0 | 4.280748  | -1.078152 | 2.684574  |
| H 0 | 4.459251  | 0.668259  | 2.671357  |
| H 0 | 5.994217  | -0.402103 | -0.561053 |
| H 0 | 5.278492  | 0.571893  | -1.865130 |
| H 0 | 5.087847  | -1.173060 | -1.882852 |
| H 0 | -4.129226 | -2.197642 | -0.214149 |
| H 0 | -5.519777 | -1.535380 | -1.119320 |
| H 0 | -5.773408 | -2.268952 | 0.487335  |

Compound **7b** - Conformer **T1**

|     |           |           |           |
|-----|-----------|-----------|-----------|
| C 0 | 0.478753  | 1.280457  | 0.019906  |
| C 0 | -0.183321 | 0.008801  | -0.545731 |
| C 0 | 0.620895  | -1.228461 | -0.119615 |
| C 0 | 2.088178  | -1.064432 | -0.514984 |
| C 0 | 2.645162  | 0.259800  | 0.035272  |
| C 0 | 4.062054  | 0.562661  | -0.469155 |
| O 0 | 1.838713  | 1.342723  | -0.427430 |
| O 0 | -0.200817 | 2.383371  | -0.468059 |
| N 0 | -1.585497 | -0.094760 | -0.171027 |
| O 0 | 0.043024  | -2.369236 | -0.739315 |
| O 0 | 2.773158  | -2.202841 | 0.002464  |
| O 0 | 4.996225  | -0.460695 | -0.120851 |
| C 0 | -2.101479 | -0.190260 | 1.118902  |
| C 0 | -3.596341 | -0.316119 | 0.994301  |
| C 0 | -3.911809 | -0.287390 | -0.314990 |
| C 0 | -2.635738 | -0.142452 | -1.100314 |
| O 0 | -1.450777 | -0.164078 | 2.152084  |
| O 0 | -2.516872 | -0.073302 | -2.307313 |
| C 0 | 0.169095  | 3.624724  | 0.132400  |
| C 0 | -4.450211 | -0.440763 | 2.211479  |
| C 0 | -5.226479 | -0.371468 | -1.014305 |
| C 0 | 5.606352  | -0.295716 | 1.157169  |
| H 0 | 0.474011  | 1.271045  | 1.122995  |
| H 0 | -0.178845 | 0.089113  | -1.637204 |
| H 0 | 0.574889  | -1.333349 | 0.973928  |
| H 0 | 2.155370  | -1.043396 | -1.614473 |
| H 0 | 2.632926  | 0.219005  | 1.137116  |
| H 0 | 4.392269  | 1.537384  | -0.086096 |
| H 0 | 4.046954  | 0.612093  | -1.562554 |
| H 0 | 0.619226  | -3.121861 | -0.541695 |
| H 0 | 3.723600  | -2.061128 | -0.142343 |
| H 0 | -0.512296 | 4.375252  | -0.271467 |
| H 0 | 1.200766  | 3.893317  | -0.117144 |
| H 0 | 0.054731  | 3.577930  | 1.224432  |
| H 0 | -5.511233 | -0.486207 | 1.956588  |
| H 0 | -4.286228 | 0.407315  | 2.885540  |
| H 0 | -4.187168 | -1.342164 | 2.776722  |
| H 0 | -6.054512 | -0.460945 | -0.307824 |
| H 0 | -5.246843 | -1.233503 | -1.690567 |
| H 0 | -5.388212 | 0.515453  | -1.637067 |
| H 0 | 4.873950  | -0.347536 | 1.973358  |
| H 0 | 6.139837  | 0.662941  | 1.209937  |
| H 0 | 6.323409  | -1.111262 | 1.270365  |

Compound **8a** - Conformer **G1**

|     |           |           |           |
|-----|-----------|-----------|-----------|
| C 0 | -0.358102 | -1.001439 | -0.053354 |
| C 0 | 0.423921  | 0.201674  | -0.637657 |
| C 0 | -0.198548 | 1.511256  | -0.125184 |
| C 0 | -1.686792 | 1.529985  | -0.489243 |
| C 0 | -2.382436 | 0.299347  | 0.103841  |
| C 0 | -3.836941 | 0.217443  | -0.309316 |
| O 0 | -1.732616 | -0.889227 | -0.373517 |
| O 0 | -0.112825 | -1.043179 | 1.328846  |
| N 0 | 1.864713  | 0.076016  | -0.376862 |
| O 0 | 0.379979  | 2.670519  | -0.714381 |
| O 0 | -2.309938 | 2.693085  | 0.033323  |
| O 0 | -4.469767 | -0.797824 | 0.509704  |
| C 0 | 2.702861  | 0.840210  | 0.434358  |
| C 0 | 4.071065  | 0.212823  | 0.393983  |
| C 0 | 4.027487  | -0.840882 | -0.442899 |
| C 0 | 2.622371  | -0.955341 | -0.959444 |
| O 0 | 2.410085  | 1.863295  | 1.037558  |
| O 0 | 2.187436  | -1.780212 | -1.741501 |
| C 0 | -0.595981 | -2.225741 | 1.969884  |
| C 0 | 5.192051  | 0.799072  | 1.184117  |
| C 0 | 5.081200  | -1.801460 | -0.880395 |
| C 0 | -5.742819 | -1.095625 | 0.211611  |
| O 0 | -6.402657 | -0.594883 | -0.669502 |
| H 0 | -0.045848 | -1.935221 | -0.533033 |
| H 0 | 0.299067  | 0.158610  | -1.724931 |
| H 0 | -0.112008 | 1.563257  | 0.964419  |
| H 0 | -1.781661 | 1.506447  | -1.587139 |
| H 0 | -2.318739 | 0.350174  | 1.198321  |
| H 0 | -3.931196 | -0.059529 | -1.362795 |
| H 0 | -4.333470 | 1.175637  | -0.140947 |
| H 0 | 1.160008  | 2.887672  | -0.177787 |
| H 0 | -1.741231 | 3.442555  | -0.200301 |
| H 0 | -0.299942 | -2.152140 | 3.017638  |
| H 0 | -0.142254 | -3.121157 | 1.523222  |
| H 0 | -1.686183 | -2.299881 | 1.897647  |
| H 0 | 6.124716  | 0.254942  | 1.021926  |
| H 0 | 4.958801  | 0.783988  | 2.254736  |
| H 0 | 5.345475  | 1.849681  | 0.914274  |
| H 0 | 6.047461  | -1.574179 | -0.425446 |
| H 0 | 5.191792  | -1.780716 | -1.970262 |
| H 0 | 4.801545  | -2.827502 | -0.616092 |
| H 0 | -6.102914 | -1.875280 | 0.898512  |

Compound **8a** - Conformer **G3**

|     |           |           |           |
|-----|-----------|-----------|-----------|
| C 0 | -0.366213 | -1.054490 | -0.325614 |
| C 0 | 0.417749  | 0.211269  | -0.754698 |
| C 0 | -0.310197 | 1.462523  | -0.235950 |
| C 0 | -1.752888 | 1.444781  | -0.752384 |
| C 0 | -2.450972 | 0.157580  | -0.296981 |
| C 0 | -3.856044 | 0.053150  | -0.867153 |
| O 0 | -1.706305 | -0.974070 | -0.775402 |
| O 0 | -0.256473 | -1.174845 | 1.069764  |
| N 0 | 1.828905  | 0.123825  | -0.352802 |
| O 0 | 0.273534  | 2.676138  | -0.697138 |
| O 0 | -2.475170 | 2.556892  | -0.251399 |
| O 0 | -4.536143 | -1.136382 | -0.394049 |
| C 0 | 2.546351  | 0.870083  | 0.581788  |
| C 0 | 3.936814  | 0.296423  | 0.651628  |
| C 0 | 4.023953  | -0.708135 | -0.240513 |
| C 0 | 2.685499  | -0.843165 | -0.907510 |
| O 0 | 2.150694  | 1.845409  | 1.204791  |
| O 0 | 2.369246  | -1.636129 | -1.775082 |
| C 0 | -0.727849 | -2.420784 | 1.585417  |
| C 0 | 4.944601  | 0.877304  | 1.585105  |
| C 0 | 5.156780  | -1.602583 | -0.616067 |
| C 0 | -5.284249 | -1.026932 | 0.716418  |
| O 0 | -5.437230 | -0.032313 | 1.386224  |
| H 0 | 0.032751  | -1.943405 | -0.825687 |
| H 0 | 0.406410  | 0.231345  | -1.849771 |
| H 0 | -0.336791 | 1.452466  | 0.857905  |
| H 0 | -1.730157 | 1.468651  | -1.854753 |
| H 0 | -2.497667 | 0.146199  | 0.798837  |
| H 0 | -3.815788 | -0.063380 | -1.952180 |
| H 0 | -4.427687 | 0.941111  | -0.593647 |
| H 0 | 0.983020  | 2.891567  | -0.069681 |
| H 0 | -1.909869 | 3.334588  | -0.375462 |
| H 0 | -0.558007 | -2.394230 | 2.663001  |
| H 0 | -0.168795 | -3.258607 | 1.146498  |
| H 0 | -1.795596 | -2.556979 | 1.383074  |
| H 0 | 5.911081  | 0.377433  | 1.494060  |
| H 0 | 4.602380  | 0.793849  | 2.622754  |
| H 0 | 5.080850  | 1.946295  | 1.387981  |
| H 0 | 6.057979  | -1.372859 | -0.043913 |
| H 0 | 5.384168  | -1.507621 | -1.683706 |
| H 0 | 4.891585  | -2.652271 | -0.447168 |
| H 0 | -5.749441 | -2.000690 | 0.928881  |

| Compound <b>8a</b> - Conformer <b>T1</b> |           |           |           | Compound <b>8b</b> - Conformer <b>G1</b> |           |           |           |
|------------------------------------------|-----------|-----------|-----------|------------------------------------------|-----------|-----------|-----------|
| C 0                                      | -0.236840 | -1.247033 | -0.214030 | C 0                                      | -0.369268 | -0.898898 | 0.033595  |
| C 0                                      | 0.426996  | 0.053896  | -0.706308 | C 0                                      | 0.417685  | 0.330933  | -0.461561 |
| C 0                                      | -0.376084 | 1.290999  | -0.259906 | C 0                                      | -0.217637 | 1.607979  | 0.118967  |
| C 0                                      | -1.835432 | 1.142487  | -0.702332 | C 0                                      | -1.714805 | 1.654913  | -0.196465 |
| C 0                                      | -2.410367 | -0.222117 | -0.266228 | C 0                                      | -2.388937 | 0.352772  | 0.262515  |
| C 0                                      | -3.763337 | -0.555926 | -0.899134 | C 0                                      | -3.851762 | 0.310024  | -0.129132 |
| O 0                                      | -1.572375 | -1.304446 | -0.693985 | O 0                                      | -1.731998 | -0.751210 | -0.361550 |
| O 0                                      | -0.154222 | -1.281519 | 1.184435  | O 0                                      | 0.159700  | -2.028853 | -0.568151 |
| N 0                                      | 1.842326  | 0.103452  | -0.321461 | N 0                                      | 1.845457  | 0.244102  | -0.168776 |
| O 0                                      | 0.161175  | 2.462761  | -0.853565 | O 0                                      | 0.337111  | 2.798129  | -0.442883 |
| O 0                                      | -2.557345 | 2.208324  | -0.097331 | O 0                                      | -2.338270 | 2.743521  | 0.470308  |
| O 0                                      | -4.783209 | 0.402101  | -0.507805 | O 0                                      | -4.462305 | -0.798115 | 0.576552  |
| C 0                                      | 2.496312  | 0.913769  | 0.610209  | C 0                                      | 2.428164  | 0.054698  | 1.087646  |
| C 0                                      | 3.947676  | 0.507161  | 0.618980  | C 0                                      | 3.897916  | -0.181860 | 0.870484  |
| C 0                                      | 4.119885  | -0.468095 | -0.292861 | C 0                                      | 4.134229  | -0.169920 | -0.456531 |
| C 0                                      | 2.783700  | -0.749669 | -0.917285 | C 0                                      | 2.829388  | 0.079667  | -1.162607 |
| O 0                                      | 2.008514  | 1.814436  | 1.274167  | O 0                                      | 1.838499  | 0.085878  | 2.155447  |
| O 0                                      | 2.531383  | -1.565247 | -1.786275 | O 0                                      | 2.638454  | 0.144977  | -2.359717 |
| C 0                                      | -0.526321 | -2.531847 | 1.766758  | C 0                                      | -0.378975 | -3.262340 | -0.084567 |
| C 0                                      | 4.912979  | 1.187094  | 1.530265  | C 0                                      | 4.812382  | -0.382826 | 2.032063  |
| C 0                                      | 5.335035  | -1.221164 | -0.718638 | C 0                                      | 5.393197  | -0.352591 | -1.235107 |
| C 0                                      | -5.541656 | 0.095086  | 0.566879  | C 0                                      | -5.747640 | -1.050747 | 0.288736  |
| O 0                                      | -5.456304 | -0.907507 | 1.232506  | O 0                                      | -6.432334 | -0.440468 | -0.499436 |
| H 0                                      | 0.245694  | -2.125154 | -0.657835 | H 0                                      | -0.327168 | -0.983288 | 1.133196  |
| H 0                                      | 0.409234  | 0.014998  | -1.800805 | H 0                                      | 0.345276  | 0.351928  | -1.553113 |
| H 0                                      | -0.364087 | 1.372539  | 0.829791  | H 0                                      | -0.094499 | 1.616299  | 1.209921  |
| H 0                                      | -1.872635 | 1.222135  | -1.800868 | H 0                                      | -1.833893 | 1.752229  | -1.286995 |
| H 0                                      | -2.505027 | -0.224269 | 0.827209  | H 0                                      | -2.308555 | 0.274702  | 1.358245  |
| H 0                                      | -4.072442 | -1.559294 | -0.603797 | H 0                                      | -3.961695 | 0.156746  | -1.206144 |
| H 0                                      | -3.707078 | -0.487372 | -1.987698 | H 0                                      | -4.349739 | 1.238798  | 0.157285  |
| H 0                                      | 0.731012  | 2.880193  | -0.192263 | H 0                                      | 1.239129  | 2.916920  | -0.118699 |
| H 0                                      | -3.471127 | 2.176379  | -0.411187 | H 0                                      | -1.830888 | 3.540674  | 0.258786  |
| H 0                                      | -0.342108 | -2.440556 | 2.838326  | H 0                                      | 0.174866  | -4.055478 | -0.589009 |
| H 0                                      | 0.085131  | -3.347956 | 1.357923  | H 0                                      | -1.443889 | -3.344900 | -0.321387 |
| H 0                                      | -1.584989 | -2.754303 | 1.594545  | H 0                                      | -0.235756 | -3.348774 | 1.001495  |
| H 0                                      | 5.923536  | 0.789897  | 1.414230  | H 0                                      | 5.842282  | -0.549258 | 1.709768  |
| H 0                                      | 4.605716  | 1.068255  | 2.575283  | H 0                                      | 4.489038  | -1.240430 | 2.632533  |
| H 0                                      | 4.933991  | 2.264812  | 1.333885  | H 0                                      | 4.789617  | 0.487495  | 2.697589  |
| H 0                                      | 6.221467  | -0.899473 | -0.167962 | H 0                                      | 6.248778  | -0.538039 | -0.582443 |
| H 0                                      | 5.517867  | -1.083014 | -1.790158 | H 0                                      | 5.601453  | 0.533989  | -1.844623 |
| H 0                                      | 5.196293  | -2.296984 | -0.563324 | H 0                                      | 5.293596  | -1.191456 | -1.932811 |
| H 0                                      | -6.262947 | 0.905924  | 0.739558  | H 0                                      | -6.090643 | -1.908570 | 0.885072  |

Compound **8b** - Conformer **G3**

|     |           |           |           |
|-----|-----------|-----------|-----------|
| C 0 | -0.417671 | -0.906326 | -0.279639 |
| C 0 | 0.384783  | 0.381580  | -0.553381 |
| C 0 | -0.344698 | 1.579922  | 0.082197  |
| C 0 | -1.798222 | 1.633502  | -0.395644 |
| C 0 | -2.481966 | 0.281358  | -0.138309 |
| C 0 | -3.898881 | 0.262462  | -0.690741 |
| O 0 | -1.734274 | -0.739326 | -0.802031 |
| O 0 | 0.203247  | -1.956700 | -0.936249 |
| N 0 | 1.774967  | 0.284822  | -0.117492 |
| O 0 | 0.235654  | 2.831066  | -0.289815 |
| O 0 | -2.520899 | 2.648738  | 0.283293  |
| O 0 | -4.562601 | -0.996608 | -0.422424 |
| C 0 | 2.223938  | -0.040014 | 1.165970  |
| C 0 | 3.712988  | -0.238677 | 1.084358  |
| C 0 | 4.089210  | -0.075819 | -0.199719 |
| C 0 | 2.862293  | 0.239570  | -1.010973 |
| O 0 | 1.523182  | -0.134174 | 2.160181  |
| O 0 | 2.798759  | 0.434440  | -2.207670 |
| C 0 | -0.352197 | -3.242985 | -0.650115 |
| C 0 | 4.502067  | -0.562398 | 2.308602  |
| C 0 | 5.427822  | -0.160123 | -0.852075 |
| C 0 | -5.220461 | -1.115757 | 0.742803  |
| O 0 | -5.301868 | -0.277176 | 1.609787  |
| H 0 | -0.489970 | -1.108165 | 0.802992  |
| H 0 | 0.429496  | 0.518581  | -1.638015 |
| H 0 | -0.342638 | 1.476466  | 1.175259  |
| H 0 | -1.794397 | 1.823658  | -1.480975 |
| H 0 | -2.511523 | 0.093030  | 0.945446  |
| H 0 | -3.878193 | 0.336885  | -1.779821 |
| H 0 | -4.470547 | 1.084679  | -0.257891 |
| H 0 | 1.086798  | 2.935232  | 0.154543  |
| H 0 | -2.000791 | 3.463246  | 0.221172  |
| H 0 | 0.279076  | -3.969205 | -1.164393 |
| H 0 | -1.379573 | -3.317700 | -1.019024 |
| H 0 | -0.333382 | -3.441840 | 0.430523  |
| H 0 | 5.561649  | -0.696293 | 2.081246  |
| H 0 | 4.124589  | -1.477565 | 2.778034  |
| H 0 | 4.401757  | 0.233136  | 3.055648  |
| H 0 | 6.212312  | -0.405888 | -0.133336 |
| H 0 | 5.680684  | 0.789156  | -1.337640 |
| H 0 | 5.422014  | -0.919963 | -1.641402 |
| H 0 | -5.685756 | -2.111053 | 0.789500  |

Compound **8b** - Conformer **G4**

|     |           |           |           |
|-----|-----------|-----------|-----------|
| C 0 | 0.408473  | 0.987618  | -0.000041 |
| C 0 | -0.430722 | -0.208778 | -0.487674 |
| C 0 | 0.152775  | -1.512845 | 0.077426  |
| C 0 | 1.646803  | -1.620144 | -0.245706 |
| C 0 | 2.377009  | -0.349767 | 0.234655  |
| C 0 | 3.843864  | -0.351164 | -0.142903 |
| O 0 | 1.771528  | 0.782276  | -0.385920 |
| O 0 | -0.061697 | 2.133703  | -0.615921 |
| N 0 | -1.842970 | -0.063028 | -0.174470 |
| O 0 | -0.570988 | -2.599868 | -0.478835 |
| O 0 | 2.116565  | -2.798074 | 0.423257  |
| O 0 | 4.490091  | 0.735685  | 0.559430  |
| C 0 | -2.414527 | 0.013068  | 1.093536  |
| C 0 | -3.904503 | 0.114152  | 0.906564  |
| C 0 | -4.163492 | 0.097248  | -0.415503 |
| C 0 | -2.853441 | -0.019128 | -1.147450 |
| O 0 | -1.804726 | 0.005092  | 2.151498  |
| O 0 | -2.680483 | -0.066746 | -2.348869 |
| C 0 | 0.502804  | 3.348105  | -0.116579 |
| C 0 | -4.811491 | 0.210087  | 2.087265  |
| C 0 | -5.448248 | 0.169216  | -1.169665 |
| C 0 | 5.810197  | 0.866860  | 0.354719  |
| O 0 | 6.489796  | 0.157621  | -0.350774 |
| H 0 | 0.364752  | 1.082098  | 1.098343  |
| H 0 | -0.374823 | -0.227486 | -1.580753 |
| H 0 | 0.047245  | -1.511422 | 1.171845  |
| H 0 | 1.764712  | -1.721299 | -1.333227 |
| H 0 | 2.288962  | -0.282656 | 1.330800  |
| H 0 | 3.968096  | -0.206203 | -1.220278 |
| H 0 | 4.320019  | -1.290114 | 0.152139  |
| H 0 | -0.200000 | -3.410383 | -0.101917 |
| H 0 | 2.788021  | -3.236972 | -0.112434 |
| H 0 | -0.011300 | 4.159031  | -0.634689 |
| H 0 | 1.576189  | 3.397826  | -0.324163 |
| H 0 | 0.332516  | 3.439113  | 0.965174  |
| H 0 | -5.858814 | 0.280659  | 1.785990  |
| H 0 | -4.561205 | 1.085869  | 2.696482  |
| H 0 | -4.691768 | -0.664435 | 2.736642  |
| H 0 | -6.305013 | 0.269007  | -0.499841 |
| H 0 | -5.584168 | -0.728829 | -1.782821 |
| H 0 | -5.440654 | 1.018957  | -1.861333 |
| H 0 | 6.184339  | 1.723759  | 0.932543  |

| Compound <b>8b</b> - Conformer <b>T1</b> |           |           |           | Compound <b>9</b> |           |           |           |
|------------------------------------------|-----------|-----------|-----------|-------------------|-----------|-----------|-----------|
| C 0                                      | 0.311074  | 1.232984  | -0.129622 | C 0               | 1.851384  | 0.047288  | -1.249948 |
| C 0                                      | -0.410723 | -0.049167 | -0.584059 | C 0               | 1.161894  | -0.470566 | 0.027293  |
| C 0                                      | 0.371215  | -1.277995 | -0.096884 | C 0               | 1.850936  | 0.095157  | 1.281056  |
| C 0                                      | 1.830871  | -1.198488 | -0.548804 | C 0               | 3.364136  | -0.167957 | 1.202067  |
| C 0                                      | 2.450156  | 0.146763  | -0.124175 | C 0               | 3.923748  | 0.317476  | -0.135971 |
| C 0                                      | 3.840109  | 0.406012  | -0.708718 | O 0               | 3.234950  | -0.282720 | -1.234532 |
| O 0                                      | 1.653174  | 1.211836  | -0.638813 | N 0               | -0.279675 | -0.201484 | 0.003047  |
| O 0                                      | -0.346860 | 2.325111  | -0.663086 | C 0               | -0.907482 | 1.047531  | 0.001772  |
| N 0                                      | -1.800688 | -0.084594 | -0.158357 | C 0               | -2.394345 | 0.801206  | 0.000448  |
| O 0                                      | -0.262364 | -2.439362 | -0.613740 | C 0               | -2.600189 | -0.530052 | 0.002355  |
| O 0                                      | 2.476972  | -2.324574 | 0.046119  | C 0               | -1.256403 | -1.207587 | 0.008177  |
| O 0                                      | 4.782448  | -0.617971 | -0.289304 | O 0               | -0.349202 | 2.131461  | -0.000164 |
| C 0                                      | -2.273833 | -0.091959 | 1.151798  | O 0               | -1.035901 | -2.404857 | 0.018561  |
| C 0                                      | -3.774185 | -0.189295 | 1.084261  | C 0               | -3.350488 | 1.946222  | -0.005381 |
| C 0                                      | -4.133706 | -0.232531 | -0.213477 | C 0               | -3.856623 | -1.334562 | 0.000027  |
| C 0                                      | -2.882805 | -0.167370 | -1.048025 | H 0               | 1.718657  | 1.135743  | -1.337047 |
| O 0                                      | -1.585849 | -0.021671 | 2.158072  | H 0               | 1.427973  | -0.433955 | -2.135963 |
| O 0                                      | -2.802476 | -0.179555 | -2.260105 | H 0               | 1.241076  | -1.562355 | 0.032219  |
| C 0                                      | 0.084245  | 3.588628  | -0.152975 | H 0               | 1.421780  | -0.363308 | 2.179497  |
| C 0                                      | -4.588142 | -0.220978 | 2.334239  | H 0               | 1.663351  | 1.173534  | 1.338100  |
| C 0                                      | -5.473213 | -0.328060 | -0.862361 | H 0               | 3.882073  | 0.338487  | 2.025854  |
| C 0                                      | 5.568100  | -0.342329 | 0.776864  | H 0               | 3.565377  | -1.242227 | 1.301390  |
| O 0                                      | 5.561987  | 0.679634  | 1.416274  | H 0               | 4.974396  | 0.040182  | -0.256519 |
| H 0                                      | 0.357052  | 1.295165  | 0.970473  | H 0               | 3.844671  | 1.415418  | -0.208385 |
| H 0                                      | -0.441164 | -0.043621 | -1.678132 | H 0               | -4.387873 | 1.605017  | -0.005970 |
| H 0                                      | 0.360010  | -1.301980 | 1.002226  | H 0               | -3.188022 | 2.579123  | -0.885013 |
| H 0                                      | 1.862504  | -1.273482 | -1.646854 | H 0               | -3.191154 | 2.585685  | 0.870035  |
| H 0                                      | 2.499732  | 0.191719  | 0.975407  | H 0               | -4.743713 | -0.697550 | -0.003540 |
| H 0                                      | 4.201010  | 1.386473  | -0.396422 | H 0               | -3.897042 | -1.988427 | 0.878395  |
| H 0                                      | 3.810884  | 0.346362  | -1.798740 | H 0               | -3.892005 | -1.990985 | -0.876676 |
| H 0                                      | 0.275690  | -3.199697 | -0.349919 |                   |           |           |           |
| H 0                                      | 3.404237  | -2.334044 | -0.228618 |                   |           |           |           |
| H 0                                      | -0.579571 | 4.336480  | -0.589320 |                   |           |           |           |
| H 0                                      | 1.118195  | 3.799978  | -0.443671 |                   |           |           |           |
| H 0                                      | -0.003523 | 3.615741  | 0.941770  |                   |           |           |           |
| H 0                                      | -5.657829 | -0.260976 | 2.117781  |                   |           |           |           |
| H 0                                      | -4.385970 | 0.663596  | 2.948335  |                   |           |           |           |
| H 0                                      | -4.322016 | -1.090885 | 2.945455  |                   |           |           |           |
| H 0                                      | -6.278538 | -0.346390 | -0.124908 |                   |           |           |           |
| H 0                                      | -5.538562 | -1.233460 | -1.476303 |                   |           |           |           |
| H 0                                      | -5.633867 | 0.518367  | -1.539304 |                   |           |           |           |
| H 0                                      | 6.225300  | -1.202069 | 0.967546  |                   |           |           |           |

Compound **10a**

|     |           |           |           |
|-----|-----------|-----------|-----------|
| C 0 | -1.639034 | -0.410155 | 0.796497  |
| C 0 | -0.876006 | -0.614680 | -0.532035 |
| C 0 | -1.565496 | 0.103039  | -1.701616 |
| C 0 | -3.041136 | -0.323862 | -1.747646 |
| C 0 | -3.699781 | -0.094542 | -0.390170 |
| O 0 | -2.995471 | -0.791185 | 0.653810  |
| O 0 | -1.486245 | 0.927987  | 1.197691  |
| N 0 | 0.546585  | -0.294192 | -0.390707 |
| C 0 | 1.477139  | -1.250918 | 0.035466  |
| C 0 | 2.814159  | -0.574006 | 0.139914  |
| C 0 | 2.649276  | 0.718096  | -0.200094 |
| C 0 | 1.198034  | 0.939068  | -0.550448 |
| O 0 | 1.223540  | -2.419620 | 0.272855  |
| O 0 | 0.707100  | 1.986196  | -0.925115 |
| C 0 | -1.956211 | 1.198475  | 2.515457  |
| C 0 | 4.024811  | -1.338849 | 0.559476  |
| C 0 | 3.621035  | 1.846971  | -0.278629 |
| H 0 | -1.246614 | -1.086652 | 1.568367  |
| H 0 | -0.902756 | -1.694273 | -0.713761 |
| H 0 | -1.055362 | -0.153834 | -2.636821 |
| H 0 | -1.486906 | 1.184718  | -1.572666 |
| H 0 | -3.123293 | -1.386266 | -2.012017 |
| H 0 | -3.576937 | 0.246330  | -2.516219 |
| H 0 | -3.737273 | 0.978107  | -0.156717 |
| H 0 | -4.716650 | -0.493645 | -0.359263 |
| H 0 | -1.735038 | 2.248703  | 2.714519  |
| H 0 | -1.435962 | 0.570379  | 3.253047  |
| H 0 | -3.035215 | 1.026338  | 2.599941  |
| H 0 | 4.905441  | -0.695952 | 0.623260  |
| H 0 | 4.233980  | -2.149391 | -0.147955 |
| H 0 | 3.862834  | -1.812226 | 1.534180  |
| H 0 | 4.625291  | 1.536157  | 0.017535  |
| H 0 | 3.302710  | 2.673731  | 0.366033  |
| H 0 | 3.663523  | 2.248264  | -1.297470 |

Compound **10b**

|     |           |           |           |
|-----|-----------|-----------|-----------|
| C 0 | 1.725375  | 0.664351  | -0.048278 |
| C 0 | 0.921906  | -0.626019 | -0.295586 |
| C 0 | 1.497006  | -1.779065 | 0.548668  |
| C 0 | 3.009820  | -1.911435 | 0.313408  |
| C 0 | 3.693829  | -0.555731 | 0.488756  |
| O 0 | 3.095336  | 0.425026  | -0.363128 |
| O 0 | 1.235175  | 1.658128  | -0.885834 |
| N 0 | -0.510523 | -0.436498 | -0.073260 |
| C 0 | -1.124129 | 0.036916  | 1.086264  |
| C 0 | -2.597609 | 0.157345  | 0.796516  |
| C 0 | -2.805675 | -0.216177 | -0.480815 |
| C 0 | -1.477408 | -0.602212 | -1.074675 |
| O 0 | -0.562798 | 0.300422  | 2.137436  |
| O 0 | -1.264286 | -1.001830 | -2.203759 |
| C 0 | 1.792269  | 2.952158  | -0.656376 |
| C 0 | -3.540906 | 0.627000  | 1.852707  |
| C 0 | -4.052719 | -0.292336 | -1.295871 |
| H 0 | 1.655713  | 0.974591  | 1.009075  |
| H 0 | 1.018492  | -0.855689 | -1.361265 |
| H 0 | 0.978266  | -2.708461 | 0.289890  |
| H 0 | 1.299633  | -1.577477 | 1.608276  |
| H 0 | 3.442171  | -2.640272 | 1.009894  |
| H 0 | 3.201900  | -2.275488 | -0.703512 |
| H 0 | 4.748507  | -0.592606 | 0.204118  |
| H 0 | 3.631226  | -0.224362 | 1.538785  |
| H 0 | 1.257807  | 3.637714  | -1.316371 |
| H 0 | 2.860779  | 2.970213  | -0.893188 |
| H 0 | 1.642968  | 3.260971  | 0.388026  |
| H 0 | -4.566909 | 0.681047  | 1.482412  |
| H 0 | -3.246459 | 1.616837  | 2.218766  |
| H 0 | -3.515732 | -0.043888 | 2.718969  |
| H 0 | -4.932095 | -0.003093 | -0.716348 |
| H 0 | -4.201415 | -1.308345 | -1.678177 |
| H 0 | -3.979162 | 0.361052  | -2.172569 |

| Compound <b>11a</b> - Conformer <b>G1</b> |           |           |           | Compound <b>11a</b> - Conformer <b>T1</b> |           |           |           |
|-------------------------------------------|-----------|-----------|-----------|-------------------------------------------|-----------|-----------|-----------|
| C 0                                       | -0.541946 | -0.934625 | -0.117850 | C 0                                       | -0.405197 | -1.187219 | 0.274931  |
| C 0                                       | 0.238277  | 0.257655  | -0.712059 | C 0                                       | 0.208941  | -0.152064 | -0.690750 |
| C 0                                       | -0.431218 | 1.590833  | -0.348629 | C 0                                       | -0.631732 | 1.129955  | -0.750736 |
| C 0                                       | -1.915617 | 1.555387  | -0.734794 | C 0                                       | -2.078957 | 0.772316  | -1.087021 |
| C 0                                       | -2.588362 | 0.338789  | -0.084675 | C 0                                       | -2.610477 | -0.269182 | -0.086440 |
| C 0                                       | -4.045976 | 0.180179  | -0.476130 | C 0                                       | -3.993703 | -0.815937 | -0.461130 |
| O 0                                       | -1.900761 | -0.852850 | -0.507299 | O 0                                       | -1.761409 | -1.430723 | -0.072765 |
| O 0                                       | -0.363984 | -0.944486 | 1.271671  | O 0                                       | -0.254770 | -0.728183 | 1.589975  |
| N 0                                       | 1.663970  | 0.206405  | -0.385671 | N 0                                       | 1.626113  | 0.079746  | -0.408330 |
| O 0                                       | -2.605450 | 2.719992  | -0.276475 | O 0                                       | -2.841660 | 1.972398  | -1.048590 |
| O 0                                       | -4.652101 | -0.769096 | 0.387311  | O 0                                       | -4.993674 | 0.202788  | -0.521315 |
| C 0                                       | 2.337880  | 0.721172  | 0.733917  | C 0                                       | 2.218731  | 1.009625  | 0.462394  |
| C 0                                       | 3.779995  | 0.295240  | 0.612042  | C 0                                       | 3.708090  | 0.773010  | 0.407774  |
| C 0                                       | 3.919207  | -0.422930 | -0.518360 | C 0                                       | 3.948759  | -0.241393 | -0.444208 |
| C 0                                       | 2.573243  | -0.505877 | -1.179481 | C 0                                       | 2.628116  | -0.715691 | -0.979340 |
| O 0                                       | 1.868158  | 1.406741  | 1.620817  | O 0                                       | 1.654651  | 1.859782  | 1.121902  |
| O 0                                       | 2.296048  | -1.079820 | -2.218600 | O 0                                       | 2.436031  | -1.625662 | -1.767898 |
| C 0                                       | -0.908549 | -2.095404 | 1.919566  | C 0                                       | -0.562742 | -1.696225 | 2.589617  |
| C 0                                       | 4.771048  | 0.697334  | 1.651758  | C 0                                       | 4.631621  | 1.619019  | 1.217772  |
| C 0                                       | 5.111771  | -1.075090 | -1.133942 | C 0                                       | 5.222891  | -0.883744 | -0.880816 |
| C 0                                       | -6.011276 | -1.005322 | 0.073800  | C 0                                       | -5.608964 | 0.503530  | 0.728399  |
| H 0                                       | -0.191597 | -1.878296 | -0.558575 | H 0                                       | 0.081159  | -2.164116 | 0.149755  |
| H 0                                       | 0.194151  | 0.116668  | -1.797052 | H 0                                       | 0.196033  | -0.635355 | -1.673306 |
| H 0                                       | 0.077002  | 2.407840  | -0.877715 | H 0                                       | -0.233976 | 1.804749  | -1.515936 |
| H 0                                       | -0.345550 | 1.782597  | 0.722833  | H 0                                       | -0.603951 | 1.658400  | 0.203938  |
| H 0                                       | -2.018471 | 1.465590  | -1.828807 | H 0                                       | -2.123676 | 0.324171  | -2.095267 |
| H 0                                       | -2.524346 | 0.441360  | 1.005861  | H 0                                       | -2.631420 | 0.188342  | 0.912401  |
| H 0                                       | -4.109471 | -0.157341 | -1.523636 | H 0                                       | -4.285356 | -1.603340 | 0.247194  |
| H 0                                       | -4.547506 | 1.154542  | -0.388350 | H 0                                       | -3.944941 | -1.258865 | -1.461266 |
| H 0                                       | -2.120085 | 3.506038  | -0.559519 | H 0                                       | -3.777802 | 1.721844  | -1.120953 |
| H 0                                       | -0.663227 | -1.996818 | 2.978389  | H 0                                       | -0.339415 | -1.230655 | 3.551122  |
| H 0                                       | -0.454009 | -3.014872 | 1.523522  | H 0                                       | 0.056975  | -2.596025 | 2.467449  |
| H 0                                       | -1.994882 | -2.146872 | 1.792267  | H 0                                       | -1.619669 | -1.985011 | 2.557509  |
| H 0                                       | 5.770471  | 0.320226  | 1.424498  | H 0                                       | 5.672664  | 1.312775  | 1.094505  |
| H 0                                       | 4.468504  | 0.323508  | 2.636310  | H 0                                       | 4.370252  | 1.564807  | 2.280325  |
| H 0                                       | 4.817738  | 1.788798  | 1.736654  | H 0                                       | 4.539306  | 2.672520  | 0.930279  |
| H 0                                       | 6.005974  | -0.938626 | -0.521994 | H 0                                       | 6.087385  | -0.447178 | -0.376038 |
| H 0                                       | 5.304088  | -0.665192 | -2.131927 | H 0                                       | 5.358581  | -0.775971 | -1.962989 |
| H 0                                       | 4.937694  | -2.148541 | -1.267847 | H 0                                       | 5.201930  | -1.959950 | -0.676529 |
| H 0                                       | -6.386499 | -1.733316 | 0.796661  | H 0                                       | -6.383995 | 1.245584  | 0.525994  |
| H 0                                       | -6.124505 | -1.416447 | -0.941372 | H 0                                       | -4.894725 | 0.920890  | 1.449963  |
| H 0                                       | -6.609400 | -0.083567 | 0.149113  | H 0                                       | -6.073754 | -0.395047 | 1.157018  |

| Compound <b>11b</b> - Conformer <b>G1</b> |           |           |           | Compound <b>11b</b> - Conformer <b>T1</b> |           |           |           |
|-------------------------------------------|-----------|-----------|-----------|-------------------------------------------|-----------|-----------|-----------|
| C 0                                       | 0.596039  | 0.820877  | -0.031779 | C 0                                       | 0.471231  | 1.112814  | 0.027725  |
| C 0                                       | -0.213936 | -0.395295 | -0.512193 | C 0                                       | -0.172853 | -0.142097 | -0.585393 |
| C 0                                       | 0.424335  | -1.684441 | 0.036727  | C 0                                       | 0.649627  | -1.389101 | -0.218847 |
| C 0                                       | 1.925206  | -1.748742 | -0.281980 | C 0                                       | 2.120424  | -1.203703 | -0.591446 |
| C 0                                       | 2.612652  | -0.447536 | 0.163876  | C 0                                       | 2.650965  | 0.121371  | -0.009670 |
| C 0                                       | 4.078515  | -0.388976 | -0.227382 | C 0                                       | 4.058980  | 0.476177  | -0.504334 |
| O 0                                       | 1.944312  | 0.650710  | -0.461552 | O 0                                       | 1.822132  | 1.204646  | -0.436896 |
| O 0                                       | 0.074800  | 1.963672  | -0.621387 | O 0                                       | -0.227041 | 2.230037  | -0.404813 |
| N 0                                       | -1.633146 | -0.297648 | -0.183677 | N 0                                       | -1.579032 | -0.278951 | -0.214669 |
| O 0                                       | 2.561230  | -2.828576 | 0.405566  | O 0                                       | 2.837332  | -2.326553 | -0.091562 |
| O 0                                       | 4.698462  | 0.680585  | 0.466997  | O 0                                       | 5.026817  | -0.521350 | -0.174022 |
| C 0                                       | -2.191943 | -0.096116 | 1.079283  | C 0                                       | -2.109978 | -0.304339 | 1.075090  |
| C 0                                       | -3.681524 | 0.030026  | 0.893762  | C 0                                       | -3.607800 | -0.390884 | 0.940305  |
| C 0                                       | -3.952037 | -0.083798 | -0.421108 | C 0                                       | -3.911536 | -0.396047 | -0.372124 |
| C 0                                       | -2.651084 | -0.295023 | -1.147544 | C 0                                       | -2.624193 | -0.319542 | -1.148108 |
| O 0                                       | -1.577626 | -0.036755 | 2.131302  | O 0                                       | -1.470375 | -0.258921 | 2.113142  |
| O 0                                       | -2.491133 | -0.453925 | -2.343184 | O 0                                       | -2.491765 | -0.307082 | -2.357272 |
| C 0                                       | 0.656245  | 3.182105  | -0.151508 | C 0                                       | 0.154113  | 3.451742  | 0.227654  |
| C 0                                       | -4.575360 | 0.244005  | 2.068797  | C 0                                       | -4.474492 | -0.450668 | 2.153223  |
| C 0                                       | -5.241059 | -0.037662 | -1.170517 | C 0                                       | -5.222077 | -0.465156 | -1.081150 |
| C 0                                       | 6.067067  | 0.826294  | 0.139007  | C 0                                       | 5.615429  | -0.370790 | 1.115168  |
| H 0                                       | 0.579492  | 0.902191  | 1.068111  | H 0                                       | 0.482126  | 1.056584  | 1.128941  |
| H 0                                       | -0.173038 | -0.385946 | -1.605714 | H 0                                       | -0.177100 | 0.005150  | -1.669967 |
| H 0                                       | -0.090592 | -2.553391 | -0.391865 | H 0                                       | 0.246949  | -2.266339 | -0.735041 |
| H 0                                       | 0.299683  | -1.724216 | 1.124779  | H 0                                       | 0.583264  | -1.578156 | 0.858493  |
| H 0                                       | 2.070201  | -1.855580 | -1.368680 | H 0                                       | 2.214152  | -1.146456 | -1.689201 |
| H 0                                       | 2.538510  | -0.362941 | 1.259497  | H 0                                       | 2.638353  | 0.047024  | 1.090622  |
| H 0                                       | 4.157074  | -0.238865 | -1.316674 | H 0                                       | 4.357105  | 1.454164  | -0.103004 |
| H 0                                       | 4.555386  | -1.345127 | 0.032177  | H 0                                       | 4.045412  | 0.545064  | -1.596857 |
| H 0                                       | 2.136250  | -3.658866 | 0.153850  | H 0                                       | 3.782908  | -2.145145 | -0.222747 |
| H 0                                       | 0.119600  | 3.989875  | -0.651955 | H 0                                       | -0.538841 | 4.213591  | -0.133437 |
| H 0                                       | 1.720451  | 3.231291  | -0.400794 | H 0                                       | 1.178653  | 3.731935  | -0.037775 |
| H 0                                       | 0.530044  | 3.277803  | 0.935988  | H 0                                       | 0.067184  | 3.368145  | 1.320066  |
| H 0                                       | -5.623185 | 0.317839  | 1.770033  | H 0                                       | -5.534185 | -0.480457 | 1.890819  |
| H 0                                       | -4.296894 | 1.159622  | 2.602499  | H 0                                       | -4.295451 | 0.417847  | 2.796679  |
| H 0                                       | -4.471980 | -0.576968 | 2.787254  | H 0                                       | -4.237162 | -1.336013 | 2.754030  |
| H 0                                       | -6.091347 | 0.113963  | -0.502138 | H 0                                       | -6.057984 | -0.512544 | -0.379991 |
| H 0                                       | -5.394897 | -0.967192 | -1.730041 | H 0                                       | -5.260941 | -1.344581 | -1.733791 |
| H 0                                       | -5.226784 | 0.770742  | -1.910129 | H 0                                       | -5.355079 | 0.408258  | -1.729275 |
| H 0                                       | 6.203148  | 1.046678  | -0.931209 | H 0                                       | 4.877360  | -0.477714 | 1.920874  |
| H 0                                       | 6.640816  | -0.080443 | 0.387408  | H 0                                       | 6.108475  | 0.606975  | 1.203677  |
| H 0                                       | 6.451027  | 1.663078  | 0.726772  | H 0                                       | 6.364187  | -1.159556 | 1.212378  |

|                                           |           |           |           |                                          |           |           |           |
|-------------------------------------------|-----------|-----------|-----------|------------------------------------------|-----------|-----------|-----------|
| Compound <b>12</b> - Conformer <b>G1</b>  |           |           |           | H O                                      | -0.422576 | 1.397928  | 0.957407  |
| C O                                       | -0.624902 | -1.165049 | 0.413545  | H O                                      | -2.109137 | 1.135403  | -1.567215 |
| C O                                       | 0.137856  | -0.142493 | -0.459239 | H O                                      | -2.587263 | 0.031793  | 1.256173  |
| C O                                       | -0.538879 | 1.225108  | -0.292619 | H O                                      | -4.205662 | -0.491292 | -1.265515 |
| C O                                       | -2.027261 | 1.098585  | -0.643244 | H O                                      | -4.615893 | 0.808319  | -0.106714 |
| C O                                       | -2.686849 | 0.009956  | 0.217580  | H O                                      | 0.864481  | 2.623752  | -0.428891 |
| C O                                       | -4.143133 | -0.214715 | -0.147383 | H O                                      | -2.149159 | 3.128011  | -0.285080 |
| O O                                       | -1.986158 | -1.221634 | 0.028348  | H O                                      | 5.589434  | -0.250089 | 1.822519  |
| N O                                       | 1.576253  | -0.152305 | -0.131810 | H O                                      | 4.253506  | -0.754548 | 2.881513  |
| O O                                       | -0.001736 | 2.239251  | -1.136057 | H O                                      | 4.486253  | 0.949370  | 2.532655  |
| O O                                       | -2.687010 | 2.334436  | -0.406985 | H O                                      | 6.019584  | -0.756996 | -0.410695 |
| O O                                       | -4.764853 | -0.966601 | 0.881125  | H O                                      | 5.337524  | -0.052446 | -1.893562 |
| C O                                       | 2.381939  | 0.835618  | 0.433866  | H O                                      | 5.108874  | -1.760637 | -1.561982 |
| C O                                       | 3.783518  | 0.292078  | 0.516819  | H O                                      | -6.226112 | -1.740023 | -0.682483 |
| C O                                       | 3.792967  | -0.935625 | -0.035734 | H O                                      | -6.689535 | -0.418061 | 0.430473  |
| C O                                       | 2.393402  | -1.245707 | -0.484170 | H O                                      | -6.475300 | -2.078782 | 1.053240  |
| O O                                       | 2.036454  | 1.958350  | 0.777718  | Compound <b>12</b> - Conformer <b>T1</b> |           |           |           |
| O O                                       | 2.007216  | -2.246054 | -1.056872 | C O                                      | 0.507344  | -0.327541 | -1.602929 |
| C O                                       | 4.874743  | 1.111756  | 1.118760  | C O                                      | -0.174967 | -0.610153 | -0.251713 |
| C O                                       | 4.894794  | -1.919104 | -0.242255 | C O                                      | 0.606253  | 0.070933  | 0.877434  |
| C O                                       | -6.118035 | -1.267311 | 0.598345  | C O                                      | 2.071952  | -0.358936 | 0.812043  |
| H O                                       | -0.220492 | -2.167556 | 0.269060  | C O                                      | 2.652842  | -0.098084 | -0.590643 |
| H O                                       | -0.528795 | -0.888761 | 1.477038  | C O                                      | 4.070134  | -0.661639 | -0.755634 |
| H O                                       | 0.054224  | -0.455258 | -1.505837 | O O                                      | 1.865449  | -0.762354 | -1.577528 |
| H O                                       | -0.469026 | 1.544240  | 0.754895  | N O                                      | -1.584105 | -0.226929 | -0.267972 |
| H O                                       | -2.115006 | 0.817164  | -1.705082 | O O                                      | 0.014116  | -0.290792 | 2.119002  |
| H O                                       | -2.635780 | 0.310592  | 1.276218  | O O                                      | 2.751931  | 0.376840  | 1.826958  |
| H O                                       | -4.194250 | -0.755022 | -1.106808 | O O                                      | 4.992930  | -0.108799 | 0.185489  |
| H O                                       | -4.637182 | 0.760541  | -0.264928 | C O                                      | -2.102951 | 1.069410  | -0.308993 |
| H O                                       | 0.761748  | 2.611108  | -0.665541 | C O                                      | -3.594380 | 0.959094  | -0.135834 |
| H O                                       | -2.137242 | 3.022568  | -0.811800 | C O                                      | -3.906198 | -0.343628 | 0.008533  |
| H O                                       | 5.837467  | 0.599430  | 1.065085  | C O                                      | -2.631530 | -1.138920 | -0.064217 |
| H O                                       | 4.655555  | 1.335970  | 2.168869  | O O                                      | -1.458335 | 2.092216  | -0.469704 |
| H O                                       | 4.959285  | 2.076232  | 0.606317  | O O                                      | -2.508836 | -2.345863 | 0.019164  |
| H O                                       | 5.853350  | -1.529186 | 0.106196  | C O                                      | -4.449453 | 2.181522  | -0.147597 |
| H O                                       | 4.983683  | -2.179301 | -1.302677 | C O                                      | -5.216425 | -1.027888 | 0.208681  |
| H O                                       | 4.682257  | -2.853250 | 0.290031  | C O                                      | 5.616679  | 1.101278  | -0.238340 |
| H O                                       | -6.212441 | -1.877294 | -0.313444 | H O                                      | 0.019622  | -0.894305 | -2.399281 |
| H O                                       | -6.718192 | -0.352217 | 0.473428  | H O                                      | 0.453154  | 0.743839  | -1.841248 |
| H O                                       | -6.505191 | -1.834421 | 1.447814  | H O                                      | -0.176954 | -1.690499 | -0.075767 |
| Compound <b>12</b> - Conformer <b>G1'</b> |           |           |           | H O                                      | 0.565204  | 1.161066  | 0.745704  |
| C O                                       | -0.619841 | -1.253710 | 0.099590  | H O                                      | 2.129804  | -1.439586 | 1.020311  |
| C O                                       | 0.153889  | -0.075152 | -0.526304 | H O                                      | 2.649507  | 0.988835  | -0.776635 |
| C O                                       | -0.518641 | 1.246880  | -0.124518 | H O                                      | 4.416451  | -0.495116 | -1.784087 |
| C O                                       | -2.009471 | 1.201607  | -0.471908 | H O                                      | 4.047727  | -1.740713 | -0.572757 |
| C O                                       | -2.663541 | -0.038627 | 0.159737  | H O                                      | 0.587239  | 0.053673  | 2.819304  |
| C O                                       | -4.129020 | -0.171707 | -0.213266 | H O                                      | 3.703357  | 0.208681  | 1.719788  |
| O O                                       | -1.979292 | -1.206758 | -0.300992 | H O                                      | -5.508551 | 1.933873  | -0.049462 |
| N O                                       | 1.579382  | -0.110771 | -0.190373 | H O                                      | -4.303466 | 2.745016  | -1.075792 |
| O O                                       | 0.019071  | 2.375553  | -0.823353 | H O                                      | -4.169742 | 2.854120  | 0.671207  |
| O O                                       | -2.667506 | 2.365869  | 0.012065  | H O                                      | -6.045670 | -0.317351 | 0.217337  |
| O O                                       | -4.736472 | -1.124767 | 0.642238  | H O                                      | -5.219132 | -1.581850 | 1.154200  |
| C O                                       | 2.159921  | 0.051947  | 1.071996  | H O                                      | -5.391542 | -1.764582 | -0.583259 |
| C O                                       | 3.641259  | -0.171629 | 0.917172  | H O                                      | 4.891058  | 1.914221  | -0.371875 |
| C O                                       | 3.890185  | -0.465886 | -0.374192 | H O                                      | 6.162624  | 0.945709  | -1.178566 |
| C O                                       | 2.581254  | -0.453506 | -1.115856 | H O                                      | 6.324198  | 1.380795  | 0.544887  |
| O O                                       | 1.567271  | 0.336797  | 2.099081  |                                          |           |           |           |
| O O                                       | 2.398036  | -0.695024 | -2.292979 |                                          |           |           |           |
| C O                                       | 4.550363  | -0.052802 | 2.094122  |                                          |           |           |           |
| C O                                       | 5.163176  | -0.774381 | -1.087836 |                                          |           |           |           |
| C O                                       | -6.100418 | -1.344019 | 0.337214  |                                          |           |           |           |
| H O                                       | -0.220180 | -2.203888 | -0.263808 |                                          |           |           |           |
| H O                                       | -0.535806 | -1.228608 | 1.195997  |                                          |           |           |           |
| H O                                       | 0.117746  | -0.171268 | -1.615604 |                                          |           |           |           |

Compound **13a**

|     |           |           |           |
|-----|-----------|-----------|-----------|
| C 0 | 0.873287  | 1.262567  | 0.590246  |
| C 0 | 1.961765  | 0.173851  | 0.663024  |
| C 0 | 1.586911  | -0.997677 | -0.253743 |
| C 0 | 0.182567  | -1.505706 | 0.053116  |
| C 0 | -0.809120 | -0.340110 | -0.063750 |
| C 0 | -2.227472 | -0.733466 | 0.302900  |
| O 0 | -0.408283 | 0.714241  | 0.833650  |
| O 0 | 0.974844  | 1.886283  | -0.669621 |
| N 0 | 3.320765  | 0.607872  | 0.332915  |
| O 0 | 2.492548  | -2.084483 | -0.083632 |
| O 0 | -0.205841 | -2.528355 | -0.858961 |
| O 0 | -3.112429 | 0.293046  | -0.118582 |
| C 0 | 0.127254  | 3.025769  | -0.828425 |
| C 0 | -4.461971 | 0.021409  | 0.208793  |
| H 0 | 1.003850  | 2.008020  | 1.389012  |
| H 0 | 1.970218  | -0.201961 | 1.692777  |
| H 0 | 1.607807  | -0.658431 | -1.300753 |
| H 0 | 0.167163  | -1.893073 | 1.084716  |
| H 0 | -0.805720 | 0.029405  | -1.096961 |
| H 0 | -2.297417 | -0.878256 | 1.393289  |
| H 0 | -2.472456 | -1.682361 | -0.195274 |
| H 0 | 3.753296  | 1.114499  | 1.099352  |
| H 0 | 3.302109  | 1.222675  | -0.477884 |
| H 0 | 3.382414  | -1.694831 | -0.088346 |
| H 0 | 0.528910  | -3.156759 | -0.912965 |
| H 0 | 0.331364  | 3.427792  | -1.822401 |
| H 0 | 0.359409  | 3.788759  | -0.071792 |
| H 0 | -0.928521 | 2.747871  | -0.748385 |
| H 0 | -5.058225 | 0.856907  | -0.164981 |
| H 0 | -4.603051 | -0.061341 | 1.297659  |
| H 0 | -4.812548 | -0.909706 | -0.263260 |

Compound **13b**

|     |           |           |           |
|-----|-----------|-----------|-----------|
| C 0 | -0.926964 | 1.171929  | 0.180773  |
| C 0 | -1.984335 | 0.112892  | -0.192111 |
| C 0 | -1.471168 | -1.285004 | 0.201729  |
| C 0 | -0.047268 | -1.561135 | -0.274257 |
| C 0 | 0.868224  | -0.422023 | 0.193261  |
| C 0 | 2.297861  | -0.583165 | -0.291816 |
| O 0 | 0.353901  | 0.800966  | -0.329943 |
| O 0 | -1.285732 | 2.377526  | -0.396858 |
| N 0 | -3.276753 | 0.431571  | 0.405368  |
| O 0 | -2.283196 | -2.333438 | -0.337023 |
| O 0 | 0.432347  | -2.793698 | 0.254126  |
| O 0 | 3.129298  | 0.318617  | 0.420040  |
| C 0 | -0.518532 | 3.496303  | 0.045287  |
| C 0 | 4.479944  | 0.264319  | 0.001672  |
| H 0 | -0.852237 | 1.273362  | 1.282536  |
| H 0 | -2.089833 | 0.156294  | -1.281499 |
| H 0 | -1.467391 | -1.360706 | 1.303577  |
| H 0 | -0.043485 | -1.589760 | -1.374896 |
| H 0 | 0.879493  | -0.393080 | 1.294971  |
| H 0 | 2.337437  | -0.373963 | -1.373243 |
| H 0 | 2.618876  | -1.620819 | -0.121403 |
| H 0 | -3.423737 | 0.044810  | 1.331229  |
| H 0 | -4.072384 | 0.253856  | -0.192315 |
| H 0 | -3.185237 | -2.231679 | -0.004608 |
| H 0 | -0.240537 | -3.464961 | 0.069486  |
| H 0 | -0.944885 | 4.372998  | -0.445490 |
| H 0 | 0.535312  | 3.390818  | -0.231633 |
| H 0 | -0.600222 | 3.616220  | 1.135136  |
| H 0 | 4.583882  | 0.539996  | -1.059231 |
| H 0 | 4.908320  | -0.739690 | 0.147946  |
| H 0 | 5.034397  | 0.980826  | 0.611884  |
